# Supplementary material for: Post-glacial reshaping of Alpine topography induced by landsliding
Source: Copernicus journal article supplement (doi:10.5194/egusphere-2025-2088), 2025-05-26
Supplement: Supplementary file [file egusphere-2025-2088-RC2-supplement.pdf]

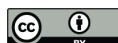

## Post-glacial reshaping of Alpine topography induced by landsliding

Coline Ariagno<sup>1,2</sup>, Philippe Steer<sup>1</sup>, Pierre G. Valla<sup>2</sup>, Benjamin Campforts<sup>3</sup>

<sup>1</sup>Université Rennes, Géosciences

<sup>2</sup>ISTerre, Grenoble CNRS

<sup>3</sup>Department of Earth Sciences, VU University Amsterdam, Netherlands

*Correspondence to* : Coline Ariagno (coline.ariagno@univ-rennes.fr)

**Abstract.** In steep alpine environments, successive glacial-interglacial cycles during the Quaternary led to multiple transient geomorphological phases. In particular, post-glacial periods are key transition phases experiencing rapid geomorphic changes, characterized by intense hillslope processes where ice and permafrost have retreated. Mass wasting is the dominant post-glacial process driving sediment production in steep mountain landscapes. However, its role in shaping topography, particularly in comparison to glacial activity—known for its strong deformational impact—remains poorly understood. By integrating numerical modeling with topographic data, we refine our understanding of how mass wasting shapes evolving landscape and influences sediment dynamics. In the Ecrins massif (French western Alps), we select three catchments, with particular morphological signatures or inheritance (i.e. from fluvial to glacial) to model their associated topographic evolution driven by mass wasting. Using the landscape evolution model ‘HyLands’, we quantitatively assess their individual response to landsliding by exploring the role of different internal or external factors (e.g., bedrock cohesion, return time of landslides). The model is calibrated with the output landslide area-volume scaling law and the massif-averaged denudation rate, inferred from literature. We focus on the cumulative impact of landslides, over a single post-glacial period, on catchment slope distribution, hypsometry, produced sediment volume and erosion rate. Compared to fluvial ones, inherited glacial topography shows a bimodal distribution of elevation for unstable slopes, near the crests and along the U-shape valley walls. The time evolution of this distribution is characterized by a decrease in the number of unstable slopes as well as a lowering in maximum catchment elevations induced by landsliding, usually attributed to the glacial buzzsaw. Indeed, glaciers may be not the only agent controlling mountain elevation, as we discussed in this study. Despite the stochastic nature of landslides, our modeling results also show that landslide activity and induced erosion rates are maximum at the onset of the glacial retreat and then progressive decay during the interglacial period. On the contrary, fluvial catchments show a more stable topography and less intense landslide activity resulting in lower erosion rates. This study quantitatively explores the non-linear interactions between landslides and catchment topographic evolution and questions the role of landslides in the erosion pulse during the Quaternary interglacial periods.



## 40     **1. Introduction**

41     The Quaternary period is characterized by oscillations from glacial to interglacial cycles overprinting a  
42     global climatic cooling trend over the Cenozoic era (Zachos et al., 2001). These successive climatic  
43     transitions have been suggested to be associated with abrupt and transient geomorphologic and  
44     topographic changes (Champagnac et al., 2014; Peizhen et al., 2001). In high-latitude regions and  
45     mountain ranges, glaciers are usually considered as the main geomorphic and erosion agents (Hallet et  
46     al., 1996; Herman et al., 2013, 2021; Herman & Champagnac, 2016; Métivier et al., 1999). The  
47     topographic changes resulting from glacial erosion are progressive and spatially variable over a single  
48     or multiple glacial-interglacial cycle (Seguinot & Delaney, 2021) of the Quaternary (Herman et al.,  
49     2011; Pedersen & Egholm, 2013; Sternai et al., 2013; Tomkin & Braun, 2002). Glaciated landscapes  
50     have in turn been widely studied to better understand past glacier dynamics and quantify glacial erosion  
51     rates and associated topographic changes at the Earth's surface (Ganti et al., 2016; M. Koppes et al.,  
52     2015; Pedersen & Egholm, 2013; Peizhen et al., 2001; Solomina et al., 2015; Sternai et al., 2013).  
53     Glacial and periglacial processes have strongly imprinted mountainous landforms, shaping U-shaped  
54     valleys, but also cirques, arêtes and hanging valleys, all characterized by steep slopes and rugged  
55     topography (e.g. Anderson et al., 2006; Penck, 1905; Prasicek et al., 2015). In turn, glacial  
56     morphological features likely represent transient and mechanically unstable landforms under interglacial  
57     conditions (Herman & Braun, 2008; Prasicek et al., 2015), dominated by hillslope and fluvial processes.  
58     Understanding the interglacial evolution of formerly glaciated landscapes has remained challenging  
59     since it involves complex non-linear geomorphic processes and interrelated spatial/temporal scales. Yet,  
60     this is a major need for assessing the ongoing response of mountainous environments to current climate  
61     warming (e.g. Zhang et al., 2022).

62     Interglacial periods are associated with overall warming climatic conditions, leading to a progressive  
63     cryosphere degradation (i.e. glacier retreat and permafrost recession), and in turn to a shift of the main  
64     geomorphic and erosion processes. Under interglacial conditions, paraglacial (Ballantyne, 2002) and  
65     periglacial (French, 2017) processes become more efficient and affect larger mountainous areas.  
66     Hillslope processes, including landsliding, rockfall and soil creep, affect formerly glaciated mountain  
67     slopes. Rivers transport remobilized and newly-produced sediments (Roussel et al., 2018) and can  
68     locally re-incise glacial valleys (e.g. Leith et al., 2018; Valla et al., 2010). Over the Quaternary, repetitive  
69     climatic oscillations between glacial and interglacial periods have caused frequent mismatches between  
70     dominant geomorphological processes and the organization or shape of the landscape on which they act.  
71     This has led to the hypothesis that these transient climatic/geomorphic conditions over the Quaternary  
72     could have led to an increase in erosion, sediment flux (M. Koppes et al., 2015; M.-N. Koppes &  
73     Montgomery, 2009; Peizhen et al., 2001) and topographic relief (Champagnac et al., 2014), rather than  
74     the supposed greater efficiency of glacial erosion itself (Koppes and Montgomery, 2009).



75 In the following work, we focus on the transient phase from glacial to interglacial conditions, hereinafter  
76 referred to as the post-glacial period, i.e. when alpine glaciers retreated and left uncovered landscape  
77 dominated by **non-glacial geomorphic agents**. In this context, steep parts of mountain hillslopes become  
78 more prone to mass wasting processes, favored by glacial debuitressing (E.-Cossart et al., 2008) and  
79 permafrost retreat (e.g. Cathala et al., 2024; Lebrouc et al., 2013). The rapid climate change observed  
80 over the last decades has motivated research on the evolution of permafrost and its impact on high-  
81 elevation rockwall dynamics (Gallach et al., 2020; Magnin et al., 2017; Ravanel et al., 2017; Stoffel et  
82 al., 2024). In addition, gravitational instabilities, such as bedrock landslides or rockfalls, are widespread  
83 in mountainous landscapes and appear as one of the most efficient processes to shape them (Keefer,  
84 1984). **Taking over glacial erosion**, hillslope activity transiently reshapes glacial morphological features  
85 leading to a postglacial increase in both the frequency and intensity of **hillslope events** through time  
86 (e.g. Korup, 2006; Zerathe et al., 2014). Landslides significantly contribute to catchment-scale erosion  
87 by mobilizing large bedrock volumes, which greatly impact sediment fluxes (Broeckx et al., 2020;  
88 Hovius et al., 1997; Zech et al., 2009). As a positive feedback loop, by decreasing the local baselevel,  
89 fluvial sediment export and incision of formerly glaciated valleys, can foster the hillslope response. The  
90 postglacial period is also associated to major changes in the hillslope-channel connectivity (Brardinoni  
91 & Hassan, 2007; Cavalli et al., 2019; Müller et al., 2022) and in the drainage system (Comiti et al., 2019;  
92 Lane et al., 2017; Pitlick et al., 2021; Zhang et al., 2022). As such, this period appears complex due to  
93 rapid morphological changes and multiple geomorphic processes that all interact and drive major  
94 changes in both the hillslope domain and the drainage network. **Therefore, quantifying the spatio-**  
95 **temporal impact of landslides on evolving postglacial landscapes is needed to better understand**  
96 **sediment production, transfer and potential storage along the source to sink pathway and assess the**  
97 **overall topographic evolution in mountainous environments.**

98 If the landsliding impact on mountain topography appears clear after a single triggering event, such as  
99 a storm or an earthquake (Dahlquist et al., 2018; Meunier et al., 2008; Morriss et al., 2023; J.-Roering,  
100 2012), their role in long-term shaping of mountain **range** is not straightforward. For investigating the  
101 post-glacial period, landslide catalogues (Blondeau et al., 2021; Wood et al., 2015), bedload records  
102 (Lane et al., 2017), remote-sensing and geophysical methods have intrinsic limitations and integration  
103 times that are too short. Conversely, long-term mountain erosion estimates from geochronological and  
104 thermochronological methods (Herman et al., 2013) or large-scale sediment budgets (Kuhlemann et al.,  
105 2002) **may have too long integration times to investigate interglacial periods**. Terrestrial cosmogenic  
106 nuclides (TCN) have been commonly used to quantify catchment-wide erosion rates over  $10^2 - 10^5$  yr  
107 timescales (Brown et al., 1995; Delunel et al., 2020; Mudd et al., 2016; Portenga & Bierman, 2011),  
108 covering glacial-interglacial cycles. Although this approach appears meaningful to address the  
109 postglacial period (~10-20 kyr), TCN-derived erosion rates are **punctual and averaged** in both space  
110 (catchment) and time. In turn, this prevents exploring in detail the spatial distribution and temporal



111 evolution of erosion during that period. Moreover, the **cosmic ray attenuation depth**, which sets the  
112 integration time of TCN (von Blanckenburg, 2005), can be significantly smaller than the depth of large  
113 ~~to-gigantic~~ landslides observed in formerly glaciated catchments (Korup, 2006; Lavé et al., 2023).  
114 Overall, this raises the question of the potential limitations of TCN-derived erosion rates in constraining  
115 the time evolution of post-glacial erosion in landscapes dominated by bedrock landsliding.

116 In this context, landscape evolution modelling (LEM) appears as a relevant approach to overcome the  
117 limited amount of data/observations and the intertwined spatial and temporal scales involved (Tucker &  
118 Hancock, 2010). Numerical modelling can combine complex surface processes, including tectonic  
119 uplift, hillslope and river dynamics integrating all the sediment transfer cascade and hillslope-channel  
120 connectivity, while allowing **predictions** over large spatial and temporal scales. Different categories of  
121 models can be considered to study mass wasting processes (Campforts et al., 2022). ~~Physical~~-based  
122 models produce realistic debris-flow (and river) propagation and deposition but may not be adapted for  
123 large-scale landscape evolution (Croissant et al., 2017; Davy et al., 2017; Dietrich et al., 1995; George  
124 & Iverson, 2014; Hergarten & Robl, 2015; Martin et al., 2023). Landscape evolution models (LEM)  
125 ~~rather~~ use reduced-complexity geomorphic laws to simulate the evolution topography over possibly long  
126 timescales and large spatial scales (Carriere et al., 2020; Langston & Tucker, 2018; Liebl et al., 2021).  
127 For instance, linear or non-linear diffusion laws are generally used to simulate hillslope erosion in most  
128 LEMs (Heimsath et al., 2005; Perron, 2011; ~~J.-J.~~ Roering et al., 1999). Soil-covered models simulate  
129 shallow landslides to follow for instance the impact of rainfall variability at large scale (Claessens et al.,  
130 2007), while bedrock-landslide models allow the distinction between constant and episodic sediment  
131 production through landslides (Campforts et al., 2020; Densmore et al., 1998). Therefore, numerical  
132 modelling offers multiple ways to simulate hillslopes processes, and their interactions, by highlighting  
133 diverse approaches, modeling complexity and spatio-temporal **scales**.

134 The aim of this study is to explore numerically, using a reduced-complexity model, the role of landslides  
135 in the postglacial morphological dynamics of mountainous landscapes. We use the HyLands model  
136 (Campforts et al., 2020, 2022), which explicitly simulate bedrock landslides, to predict associated mass  
137 redistribution and the resulting catchment-averaged erosion rates and topographic evolution through  
138 multiple timescales. We **investigated** the topographic impact of landslide activity on selected Alpine  
139 catchments, located in the Ecrins massif (France), showcasing a gradient of glacial imprint and  
140 deglaciation timing. An open question is the role of interglacial processes in erasing the inherited  
141 morphological signature of former glaciation, leading to an erosional “hot-moment”. **More specifically,**  
142 **we aim to assess the timescales, rates and locations of topographic changes associated with the transient**  
143 **shift from glacial to interglacial periods, with a particular focus on the role of landsliding. Our working**  
144 **hypothesis is that the different morphological signatures observed for Alpine catchments are evidencing**  
145 **both landslide activity and deglaciation timing.** The first objective of the study is to conduct a spatial  
146 analysis of simulated landslides to assess their magnitudes and locations within investigated catchments.



147 Then, a temporal analysis is performed to investigate whether the postglacial period remains a transient  
148 phase and how long it may require to achieve an interglacial steady-state topography and erosion  
149 dynamics under landslide activity.

150

## 151 2. Study area

### 152 2.1 ~~Tree selected~~ catchments in the Ecrins massif

153 The Ecrins massif (south-east France, Fig. 1A) forms a high-elevation high-relief area of the  
154 southwestern Alps, and today still hosts glaciers in its upper catchments. The present-day topography  
155 was deeply impacted by glaciation (van der Beek & Bourbon, 2008), and several studies have focused  
156 on constraining the timing and extent of the Last Glacial Maximum (LGM, ca. 20 ka) and post-LGM  
157 glacier fluctuations (Delunel et al., 2010; Le Roy et al., 2017). In this context, we select three small (6  
158 – 15 km<sup>2</sup> area) catchments to cover the entire Vénéon valley, from the river source, at the heart of the  
159 Ecrins massif, to the confluence with the Romanche river where tributary glaciers had a lower  
160 morphological impact (Fig. 1B). The Pilatte catchment, the highest and most glaciated catchment, peaks  
161 at ~3600 m above sea level (a.s.l.), with valley bottoms around 2000 m. Modern glaciers represent ~14%  
162 of the ~~catchment area~~ (total catchment area of approximately 15 km<sup>2</sup>). With a downstream direction  
163 toward the north, its western and eastern parts are made of granitic ~~or~~ migmatic rocks (gneiss),  
164 respectively (source: French Geological Survey BRGM). The Etages catchment, partially-glaciated at  
165 present-day (~12 %), displays similar characteristics with an area of ~14 km<sup>2</sup> and an elevation range  
166 from 3564 to 1600 m a.s.l. at the confluence with the Vénéon river. The catchment is mainly underlain  
167 by granites with crestlines composed of gneiss in its south-eastern part (Barféty et al., 1984; Delunel et  
168 al., 2014). Both catchments show steep hillslopes (>45-60°, Fig. 1C), located on the walls of the main  
169 U-shaped valley and along the highest rockwalls, considered as nunataks (Delunel et al., 2010; Marx et  
170 al., 2017), and a low-relief central valley bottom (Fig. 1D). The Etages catchment has been investigated  
171 by Delunel et al., 2014, with a detailed geomorphological mapping and use of quartz-<sup>10</sup>Be concentrations  
172 in detrital material to trace the potential geomorphic sources for river sediments. ~~The third catchment,~~  
173 ~~called “La Pisse”,~~ is completely unglaciated today and is smaller than the two other catchments (~6 km<sup>2</sup>  
174 total area). Its highest elevation at ~3050 m occurs at its southern crest, while its lowest elevation ~1250  
175 m is at the confluence with the adjacent Villard catchment. Its lithology is dominated by granites ~~even~~  
176 ~~if the southwestern crest shows few Jurassic limestone outcrops.~~ Slopes are mostly gentle in the upper  
177 part of the catchment and get steeper downstream along the valley rockwalls. Despite different glacial  
178 imprints and elevation, the slope ~~distribution~~ for the studied catchments is relatively similar (Fig. 1C),  
179 with a modal slope around 35° (0.7 m/m) for all three catchments.

180

181 These ~~3~~ investigated catchments have experienced a gradual post-LGM deglaciation, following the  
182 progressive glacier retreat along the Vénéon valley from downstream (Pisse catchment) to upstream

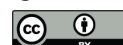

(Pilatte catchment). Following Delunel (2010), the Pisse catchment has likely started its deglaciation around 15 ka, while the Etage catchment may have been deglaciated between 13 and 7 ka. The glacier retreat in the Pilatte catchment has probably started slightly after the Etage catchment and can be considered at the end of the post-LGM deglaciation. As a consequence, the observed delay in glacier retreat between the three catchments (Fig. 1A) has likely been associated with a time-transgressive activation of periglacial processes like landslides, resulting in different topographic configurations today.

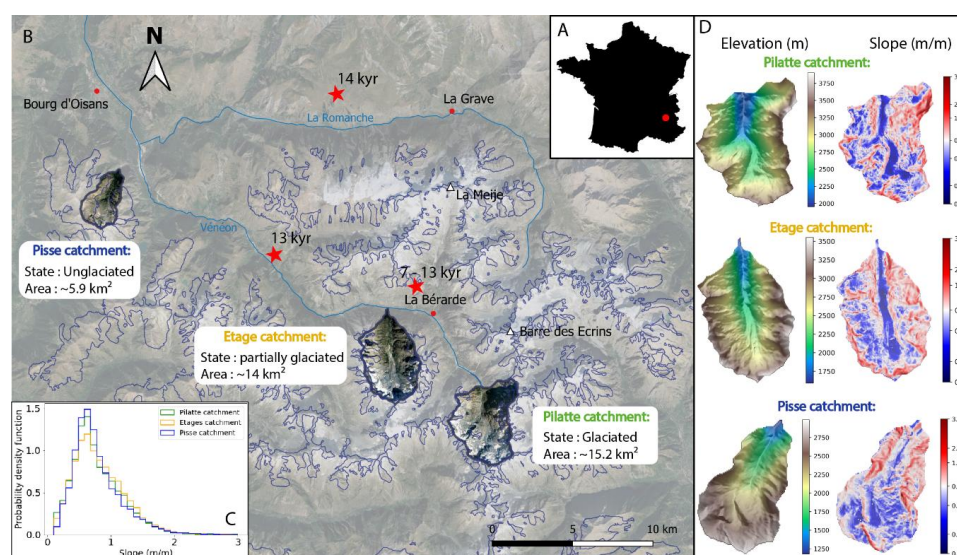

**Figure 1:** Geomorphological context of the study area. A) Location of the Ecrins massif (red dot) in France. B) Google satellite image of the Ecrins massif (background) with the three studied catchments and their characteristics: Pilatte (green label), Etages (yellow label) and Pisse (blue label). Blue thin line indicates the contour of the LGM ice extent (Delunel, 2010). Red stars report the estimated deglaciation timing (Delunel, 2010). C) Probability density function of topographic slope for the three studied catchments (25-m resolution DEM from the French National Geographic Institute IGN). Similar distributions are observed, with a main slope mode around 0.7 m/m. D) Modern elevation and slope maps for the three studied catchments.

## 2.2 Characteristics of glacial-catchment profiles

To visualize the hillslope morphologies in our studied catchments, we made topographic transects (Fig.2) along the main valley. In the literature or on the field, classical glacial topographic features, including typical U-shape valleys (Fig. 3), are well documented, easily observable and have been suggested to result from the bimodal distribution of glacial erosion with elevation (e.g. Anderson et al., 2006; Egholm et al., 2009; Herman et al., 2011; Steer et al., 2012). The observed bimodal hypsometry of glacial landscapes (Brocklehurst & Whipple, 2006) defines the boundaries between the valley overdeepening, driven by fast-moving ice with intense abrasion and quarrying, and areas with slower-moving ice exerting less erosive power (Coutterand, 2010; Leith et al., 2014). Alternatively, this bimodal hypsometry may be attributed to different patterns of cold-climate erosion around the ELA (Liebl et al.,



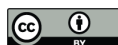

210 2021). In both interpretations, the hillslope shoulder – a slope inflection between ~~two steep~~ hillslopes,  
211 ~~known as “shouldering”~~ - is shaped during glacial periods (Louis, 1952; Valla, 2021). This topographic  
212 shouldering would result in a bimodal distribution of catchment elevations with steep slopes associated  
213 to both the glacier valley flanks (low elevations) and to the nunataks-crestlines area (i.e. periglacial  
214 regions at high elevations) (Coutterand, 2010; Liebl et al., 2021).

215 ~~In our studied catchments, the~~ two upper catchments (Pilatte and Etages catchments) ~~highlight the~~ U-  
216 shaped valley on each transect, even in the upstream part of the catchment. A slope ~~inflexion~~ is also  
217 visible along most of the ~~transect~~, which we ~~refer to as “shouldering”~~ (Fig. 3). For most of the transects,  
218 the increase in slope furthest **upstream** corresponds to the glacial trimline (Penck, 1905). It corresponds  
219 to the highest zone of the glacier extent and usually the limit between prevailing glacier erosion  
220 processes and periglacial processes, as **their elevations** match with the upper limits of the glacier cirque  
221 (Rootes & Clark, 2020) (Fig. 2). Conversely, the topographic transects for the unglaciated catchment  
222 (Pisse) tend to reveal a V+-shape valley, especially in the lower part of the catchment. The upper profile,  
223 however, is closer to those of the glacial and intermediate ~~catchment~~, showing a clear inheritance from  
224 previous glaciations.

225 In the following, we will name the three studied catchments according to their glacial morphology  
226 imprint, i.e. ‘glacial’, ‘intermediate glacial-fluvial’ and ‘fluvial’ for the Pilatte, Etages and Pisse  
227 catchments, respectively.

228

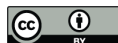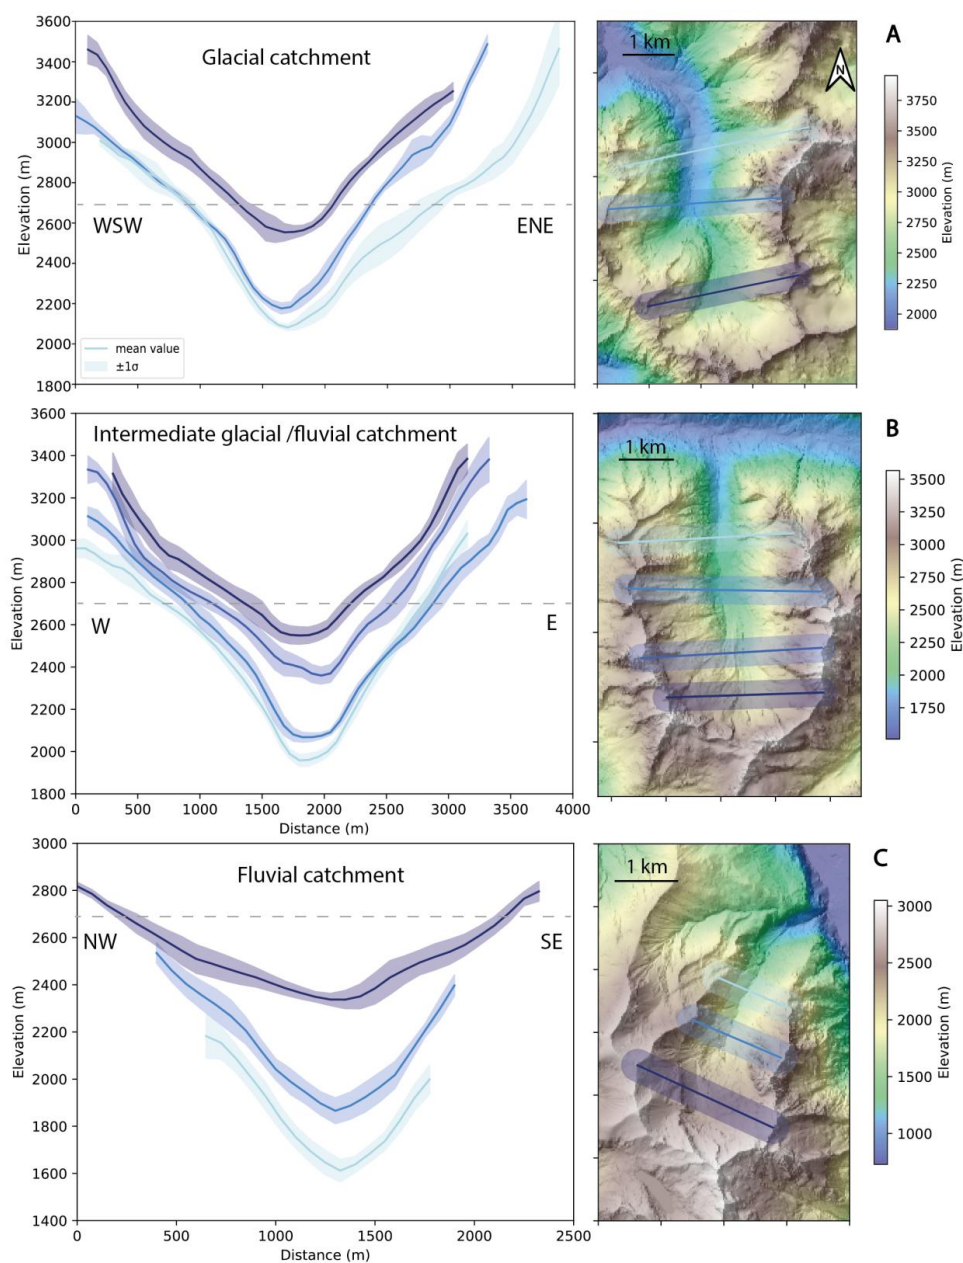

Figure 2: Swath topographic profiles for the three different catchments (Lehmann & Robert, 2024) (DEM, resolution: 50 cm, ESPG2154, from the French National Geographic Institute, Cusicanqui, 2024): (A) Glaciated catchment (Pilatte), (B) intermediate glacial-fluvial catchment (Etages), and (C) fluvial catchment (Pisse). Profiles are aligned based on their lowest area. The grey dot line illustrates the 2700 m elevation, a threshold elevation where the predicted landslides activity is lower (Figs. 6 & 7).



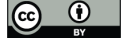

### 3. Modeling framework

Hylands is a reduced-complexity and stochastic landslide model (Campforts et al., 2020, 2022). It simulates both the erosion associated with deep-seated **gravitational** landslides and the induced sediment transport and deposition resulting from landslide runout. Hylands is part of the Landlab open-source framework (Barnhart et al., 2020; Hobbey et al., 2017), which offers tools to combine multiple geomorphic laws on 2D regular grids, **potentially applied to either synthetic topographies or digital elevation models (DEMs)**. In the following, we use the 25-m resolution DEMs from the **BD ALTI** of IGN (French National Geographic Institut), as initial model topographies for the three studied catchments. The catchment boundaries were obtained from the geo-processing tools (“Eau France” service website: <https://reseau.eaufrance.fr/geotraitements/viewer/bassin-versant>). We first here present the model and then our strategy for model calibration.

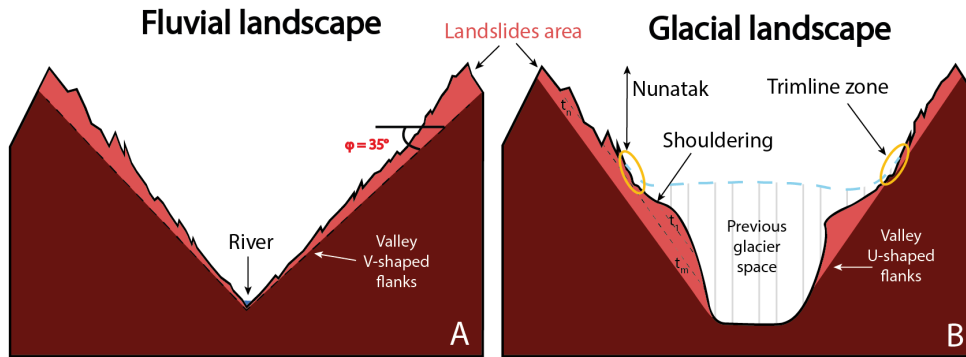

**Figure 3: Conceptual sketches of theoretical topographic fluvial (A) and glacial (B) landscapes.** A) Typical landscape dominated by fluvial erosion processes with V-shaped valley and homogeneous hillslopes slightly above the internal angle of friction ( $\phi = 35^\circ$  in this example). B) Landscape dominated by glacial erosion processes. The main morphological characteristics such as U-shaped valley, periglacial nunatak zone, shouldering or the trimline zone (yellow circle) are shown (modified from Louis, 1952; Coutterand, 2010). The light-red color indicates potential landscape areas affected by landslide activity.

#### 3.1 The HyLands model

##### 3.1.1 Landslide triggering

In HyLands, the landslide source model combines a spatial probability  $P_s$  and a temporal probability  $P_t$  to compute a landslide failure probability  $P_{failure} = P_s * P_t$ . The spatial probability is computed following a modified Culmann criterion (Campforts et al., 2020; Culmann, 1875), which is a Mohr-Coulomb criterion applied to a finite slope analysis:

$$P_s = \frac{H_s}{H_c}, \quad \text{with} \quad H_c = \frac{4C}{\rho g} \frac{\sin \beta \cos \phi}{1 - \cos(\beta - \phi)}, \quad (1)$$

where  $H_s$  (m) is the local hillslope height calculated between two adjacent cells of the grid and  $H_c$  is the maximum stable hillslope height (m), which depends on the cohesion  $C$  ( $\text{kg} \cdot \text{m}^{-1} \cdot \text{s}^{-2}$ ),  $\rho$  the rock density

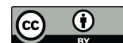

265 set to  $2700 \text{ kg.m}^{-3}$ ,  $g = 9.81 \text{ m.s}^{-2}$  the gravitational acceleration,  $\beta$  the local topographic angle, and  $\varphi$  the  
266 angle of internal friction (Eq. 1). Both  $C$  and  $\varphi$  are parameters that need to be calibrated in our modelling  
267 approach.

268 However, HyLands is not a deterministic model as it combines this spatial probability of failure to a  
269 temporal probability. Indeed,  $P_t$  controls the temporal occurrence of landslides and follows a Poisson  
270 law (Campforts et al., 2022):

$$271 \quad P_t = 1 - e^{-t/t_{LS}}, \quad (2)$$

272

273 where  $t$  (yr) is the model time and  $t_{LS}$  (yr) is the return time of landslides triggering events. In turn, the  
274 probability of failure of a given cell increases with time, until  $P_{failure}$  becomes greater or equal to one,  
275 leading to landslide triggering. The simulation time step is set to  $dt = 10 \text{ yr}$ .

276

### 277 3.1.2 Landslide erosion and deposition

278 When a landslide event is triggered, the erosion scar generates a failure **plan** which initiates at the  
279 triggering point. Following the Culmann criterion, the dip angle of this plan  $\theta$ , is the bisector of the  
280 local topography angle  $\beta$ , and the angle of internal friction of the material  $\varphi$ :

$$281 \quad \theta = \frac{\beta + \varphi}{2} \quad (3)$$

282 The failure plane is propagated upstream of the critical node if the elevation of the neighboring cells  
283 exceeds the rupture surface. In this case, all the DEM cells above this surface are considered as unstable  
284 and mobilized by landsliding.

285 Landslide-derived sediments can either be transported as wash load, determined by the fraction of fines,  
286  $F_f$  in the model, or redistributed using a non-local nonlinear deposition scheme (Campforts et al., 2022).

287 Because our **first** goal is to study landslide erosion without any potential feedback of deposited  
288 sediments, we set the fraction of fine sediments  $F_f$  to 1, meaning that all sediments are instantaneously  
289 evacuated. **It also means that in our set-up no topographic change can occur below the triggering points**  
290 **of simulated landslide sources.**

291

### 292 3.2 Strategy for model calibration

293 Our objective is to use a calibrated and physically sound landscape evolution model, based on HyLands,  
294 to predict landslide activity during postglacial conditions in our study area. Note that in these  
295 simulations, we only consider the role of landslides in landscape evolution and erosion dynamics,  
296 without modeling fluvial erosion nor tectonic activity (e.g., uplift rate). We also assume that  
297 gravitationally triggered landslides as simulated in HyLands, represent the combination of mass wasting  
298 events in alpine topography including rockfalls, debris flows, and shallow to deep-seated landslides,  
299 capturing the diverse range of slope failure processes. Our model calibration is performed on the Etages  
300 catchment following two steps:



1) Calibrating  $\phi$  and  $C$ , which control the spatial probability of landslide occurrence, by comparing the modelled landslides area-frequency distribution (3.3.2) and size-volume scaling relationship (3.3.3), with the ones of natural landslide datasets (Fig. 4; Delgado et al., 2022; Guzzetti et al., 2002).

2) Calibrating the landslide return time  $t_{LS}$ , which sets the temporal probability of landslide occurrence, by comparing modelled catchment-averaged erosion rates and observed erosion data derived from quartz  $^{10}\text{Be}$  concentrations in stream sediments (3.3.4, Fig. 5), ranging between 0.27 and 1.1 mm/yr in the Ecrins massif (Delunel et al., 2010). For the Vénéon valley and the studied catchments (i.e. Etages catchment), we can reduce the interval from 0.7 to 1.1 mm/yr for our model calibration (Fig. 5). Assuming that a rock sample records quartz  $^{10}\text{Be}$  accumulation over the time period corresponding to the upper 60 cm below the surface (Delunel et al., 2010; von Blanckenburg, 2005),  $^{10}\text{Be}$ -derived erosion rates record apparent integration times of around 500 to 2500 yr. We thus select a simulation time of 1500 yr for the model calibration phase.

313

Some combinations of parameters ( $\phi$ ,  $C$ ,  $t_{LS}$ ) lead to too few landslides, preventing a statistical analysis of their resulting size distribution. To overcome this issue, we generated a large amount of landslide events and selected a similar number of landslides per simulation. Then, we had to (1) compile multiple simulations with similar parameters but different stochastic occurrence (different seeds), (2) reduce the return time ( $t_{LS} = 100$ ). Because  $t_{LS}$  controls the occurrence of landslides without impacting their geometry, a small value of  $t_{LS}$  induces simulation outputs with large landslide datasets. This is particularly true given that the potential for landsliding remain significant throughout the simulation. The first approach was used for all the parameter calibration (Figs. 4A-C, 5), while the second approach was only used in the landslide size-frequency calibration (Fig. 4A) because the modified return time value can induce changes in landslide volumes and occurrences, and thus in output catchment-averaged erosion rates (Fig. 5).

325

### 3.3 Model calibration

#### 3.3.1 Calibration of the angle of internal friction: landslide area-frequency distribution

Because we are lacking detailed compilation of alpine mass-wasting events, HyLands will be calibrated against global compilations of landslide data. More specifically, we aim at constraining the cohesion and angle of internal friction parameters. Although not calibrated to our specific field site, this general calibration will allow assessing the impact of gravity driven erosion in high alpine terrain and therefore provides sufficient for this study. For our calibration runs, we run HyLands from existing topography of the three catchments and set model parameters not involved in the calibration equal to those as reported in Table S1.

335

336



Field inventories of landslides and rockfalls show a well-known shape for the frequency distribution of landslide area, highlighting several characteristics of a power-law relationship (Delgado et al., 2022; Guzzetti et al., 2002; Jeandet et al., 2019; Malamud et al., 2004; Stark & Hovius, 2001; Tanyaş et al., 2019; Tebbens, 2020): (1) the rollover value, matching the highest frequency of the landslide-area distribution, (2) the power-law scaling exponent,  $\alpha$ , defined from the slope of the linear regression measured for large landslides events and (3) the cutoff value, related to the divergence of the distribution from a power-law scaling. With the exception of few parameter combinations (in the range of tested parameters of friction and cohesion), the simulated landslides size-frequency distributions we obtained do not display any clear rollover. This lack of rollover is probably due to the coarse resolution of the grid (25 m) which makes it impossible to visualize small landslides. we do not use this criterion for our model calibration approach. The power-law scaling exponent is a key parameter as it describes the frequency of intermediate to large landslides, which convey most of the eroded volume. This exponent also varies significantly with the internal angle of friction (Fig. 4B). As no power-law exponent value exists for the French Alps landslide-rockfall inventories, we use as a reference the mean value  $\alpha_{\text{mean}} = -2.3$  suggested by (Van Den Eeckhaut et al., 2007) from a global landslide compilation. (Tanyaş et al., 2018, 2019) also carried out a landslide compilation and analysis of landslide size-frequency distributions, proposing a slightly higher power-law exponent ( $\alpha_{\text{mean}} = -2.5$ ). However, this inventory only considers earthquake-induced landslides. In addition, power-law exponents tend to be smaller for igneous or metamorphic rock (such as present in our study area) (Bennett et al., 2012), so we retain the value of -2.3 for our model calibration. In our calibration phase, we set the cutoff area at  $3 \cdot 10^4 \text{ m}^2$  based on the shape of the linear regression fit and the good value of the Pearson correlation coefficient (Fig. 4A). Our cutoff value seems to be smaller but overall consistent with previously reported values (Tanyaş et al., 2018; 2019).

The simulated landslide size-frequency distribution (Fig. 4A), in a log-log plot, illustrates the decrease in landslide number when increasing landslide size. From all simulated landslides ( $5 \cdot 10^4$  in total; see Section 3.2), we randomly select 20 000 landslides to construct the landslide size-frequency distribution. This method ensures a homogeneous number of events between different combinations of input parameters (Fig. 4B). Therefore, we compare the simulated power-law scaling exponent  $\alpha$ , resulting from different combinations of cohesion ( $C$ ) and internal friction angle ( $\varphi$ ), with the literature power-law exponent of -2.3. The power-law regression is computed using a log-log linear fit. The output matrix (Fig. 4B) shows a gradient for the power-law exponent  $\alpha$  with increasing  $\varphi$  values. In our simulations,  $\alpha$  varies strongly, between -1.7 and -3.1, when changing the internal angle of friction ( $31$ – $39^\circ$ , Fig. 4B). This range is consistent with global compilations of power-law exponents for landslide-area scaling (Tanyaş et al., 2018, 2019; Van Den Eeckhaut et al., 2007). We also observe little variability in  $\alpha$  with cohesion ( $C$ ). Therefore, we fix the internal angle of friction at  $\varphi = 35^\circ$  which leads to simulated values of  $\alpha$  close to -2.3. As the cohesion parameter seems to not influence the power-law exponent of the



landslides size-frequency distribution, we calibrate this parameter using an alternative strategy (see section 3.3.3).

376

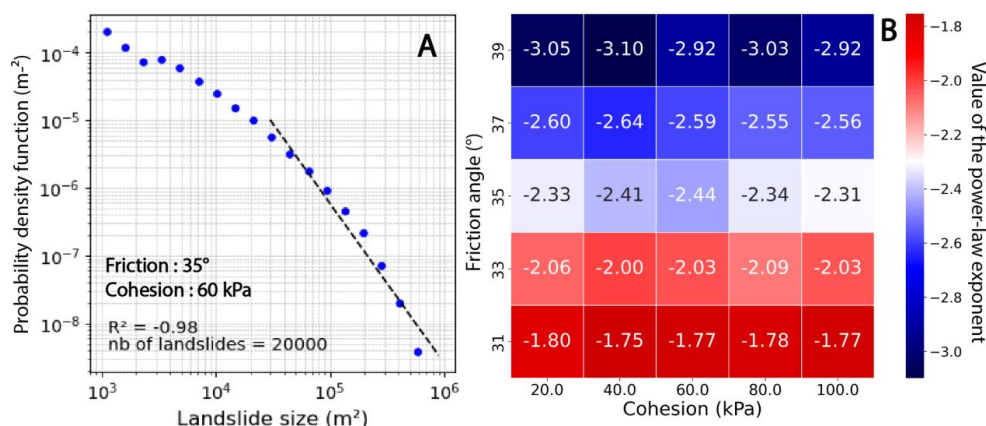

377

Figure 4: Calibration approach for the internal angle of friction and the cohesion in HyLand model. Calibration outcomes result from multiple simulations, with similar input parameters, to get a larger dataset of landslides (see text for discussion). A) Landslide size distribution, with a linear fit (dashed black line) on the power-law tail of the distribution. The cutoff value (i.e. minimum size where the linear fit starts) is set to  $3 \cdot 10^4 m^2$ . B) Calibration matrix between the internal angle of friction ( $\phi$ ) and the cohesion (C). The angle of friction is calibrated based on the minimum difference between the power-law exponent of the simulated size distribution and the reference value (-2.3; van den Eeckhaut et al., 2007). Blue colors indicate output power-law exponents smaller than the reference value (-2.3, white colors) and red colors indicate predicted power-law exponents higher than the reference value.

386

As a verification of our model calibration, we also simulate the area-volume relationship for simulated landslide distributions (Fig. S1). The relevant cloud of landslides events ( $n=426$ ) shows a power-law scaling similar to those observed elsewhere with an intercept value of 0.84 and an exponent value  $\gamma=1.49$  (Fig. S1) (Larsen et al, 2010; Wood et al, 2015).

391

### 3.3.3 Calibration of landslide return time and cohesion: $^{10}Be$ -derived erosion rate

To calibrate the cohesion and the landslide return time parameters, we compare simulated and  $^{10}Be$ -derived catchment-averaged erosion rates (3.2, Fig. 5). Both model parameters impact nonlinearly the output erosion rate, and increasing  $t_{LS}$  or  $C$  leads to lower output erosion rates (Fig. 5). Several combinations of parameters predict an output catchment-averaged erosion rate within the expected range (0.7 – 1.1 mm/yr): 1) a high  $C=100$  kPa associated with a short  $t_{LS}=80$  kyr, 2) a small  $C=40$  kPa associated with a long  $t_{LS}=250$  kyr, or 3) an intermediate parameter combination with  $C=60$  kPa and  $t_{LS}=150$  kyr. These three model parameterizations also lead to roughly similar spatial and temporal patterns in landslide activity. In the following, we therefore use the intermediate parameter combination (Fig. 5).

402

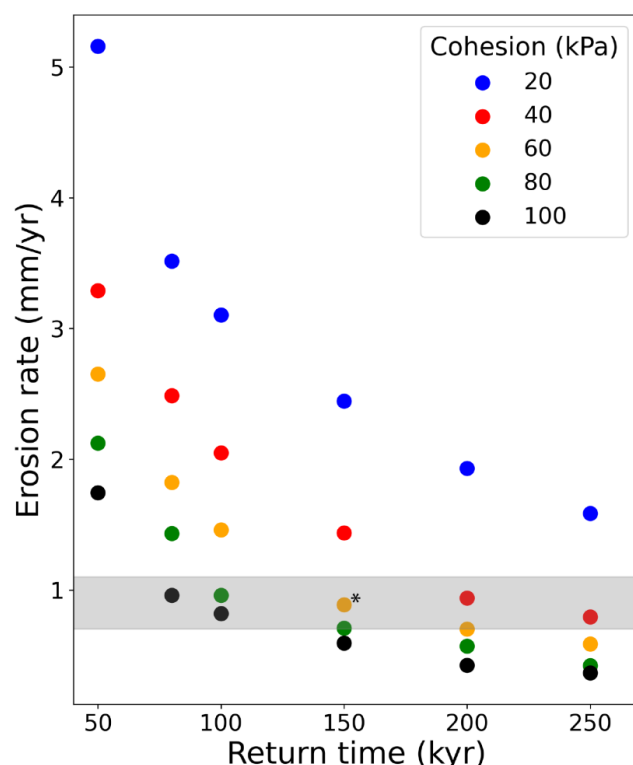

Figure 5: Calibration of the landslide return time and cohesion parameters based on the simulated catchment-averaged landslide erosion rate. Considering the calibrated angle of internal friction ( $35^\circ$ , Fig. 4B), each dot represents a particular combination of landslide return time and cohesion (color code indicating the cohesion value). The selected combination is identified with a stars (\*). The simulated erosion rate is an averaged catchment-scale erosion rate over a compilation of 20 different simulations (1500 yr duration). The grey band illustrates the range of literature values (0.7-1.1 mm/yr; Delunel et al., 2010).

## 4. Results

### 4.1 Spatial and temporal distribution of landslide activity

Using the calibrated model, we investigate the impact of landslide activity on catchment topographic changes over 100 kyr (timescales for glacial-interglacial cycles). Over this timescale, the calibrated landscape evolution model generates different spatial patterns of landslide erosion across the three studied catchments (Fig. 6). In each catchment, landslide erosion is distributed heterogeneously, ranging from areas experiencing an intense landslide activity and significant topographic changes to overall unaffected areas. For the Pilatte catchment (glacial), significant topographic changes, up to 500 m, occur along its northeast ridges. Elsewhere, predicted landslides lead to smaller topographic changes, around 100 m (Fig. 6A). The intermediate glacial-fluvial catchment (Etages) shows erosion patches along its crests and summit walls. In some areas, cumulated erosion reaches 350 m, while shallower landslides are observed on low-elevation hillslopes, just above the valley bottom (Fig. 6B). For the Pisse catchment (fluvial), landslide erosion is mainly focused on the downstream parts of the catchment where the valley narrows and slopes become steeper. Cumulated landslide erosion reaches up to 250 m, however, the



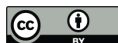

424 upper part of the catchment shows limited landslide activity (Fig. 6C). The final slopes across the three  
425 catchments clearly highlight the locus of landslide activity. Indeed, landsliding results in homogeneous  
426 slopes which only slightly exceeds the internal angle of friction (i.e., 0.7, represented by white color in  
427 Fig. 6).

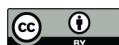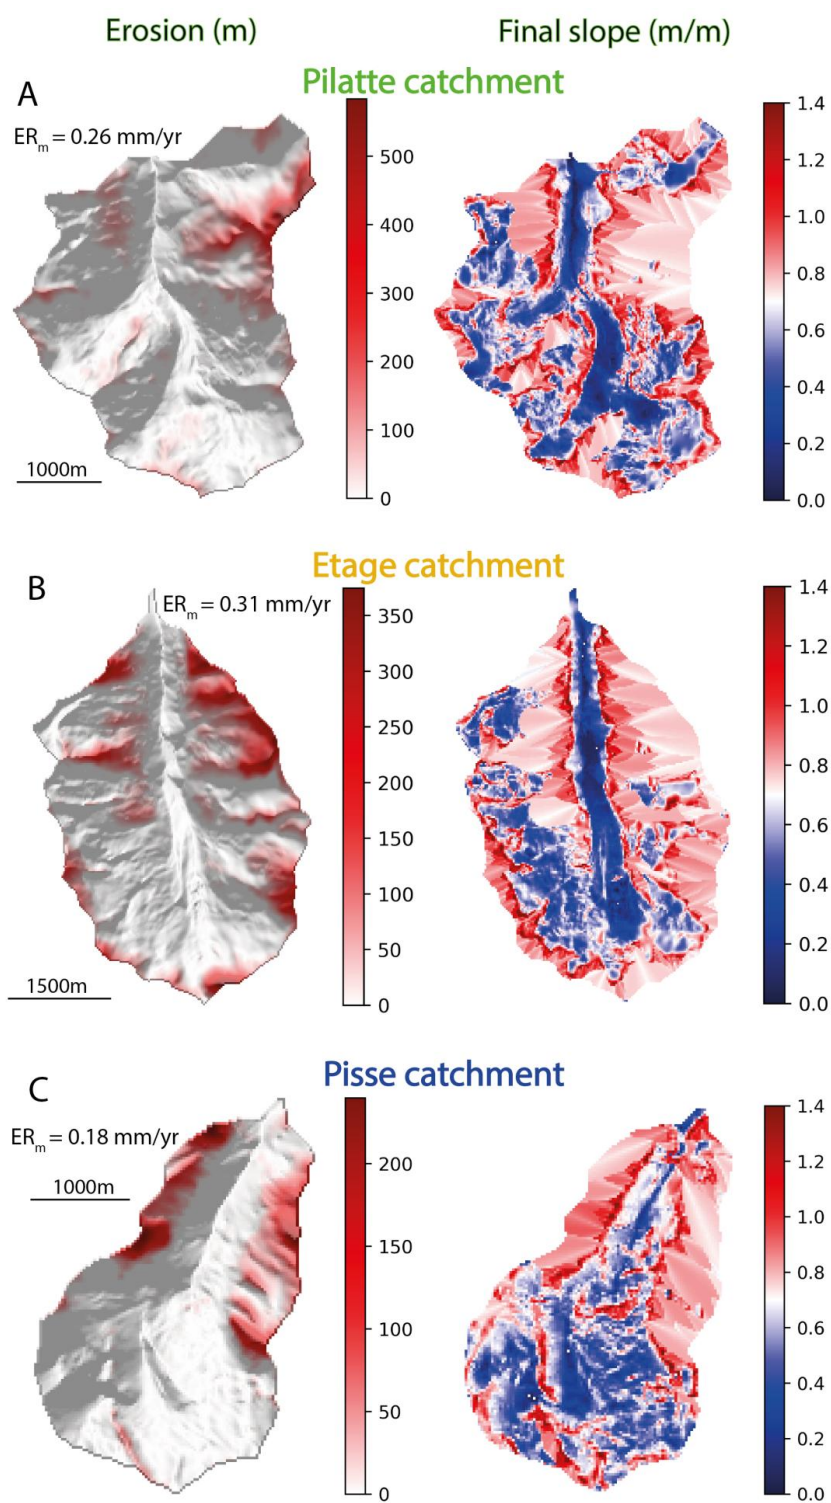



429

430 **Figure 6:** Simulation results of cumulative landslide erosion and final slope distribution for the studied different  
431 catchments (A - Pilatte, B - Etages, C - Pisse). Left panels display landslide erosion patterns with cumulative landslide  
432 erosion (red color) over 100-kyr simulation duration on the modern hillshade DEM. Right panels show the final slope  
433 distributions where the landslide activity results in more homogenous slope patterns around the input internal angle of  
434 friction (0.7 m/m, white colors).

435

## 436 4.2 Spatial distribution of landslides

437 For each catchment, we investigate the simulated evolution of both the hypsometric and topographic  
438 slope distributions (i.e. ~~2D histograms of catchment slope and elevation~~, Fig. 7A,D,E). As expected  
439 from the modern slope distribution (Fig. 1C), the initial catchment topographies (i.e., at 0 kyr) show a  
440 similar modal slope around 0.6 m/m. This modal slope is reached at different elevations for the different  
441 catchments: 2800, 2600 and 2600 m a.s.l. for the glacial, intermediate glacial-fluvial and fluvial  
442 catchment, respectively (Fig. 7A,D,G).

443 The initial model topographies of the Pilatte (glacial) and Etage (intermediate glacial-fluvial)  
444 catchments show a bimodal distribution of the elevations for steep slopes (Fig. 7A,D et 8) (Fig. S2).

445 The steepest slopes of the glacial catchment range between 2 and 4.5 m/m (i.e between ~63 and 77°)  
446 and are mostly restricted to the highest elevations (3000- 4000 m) (Fig. 7A). A second peak of steep  
447 slopes, with lower magnitudes (~~1.5–~~2.5 m/m i.e ~56° - 68°), is found around 2400 m. The intermediate  
448 glacial-fluvial catchment also shows an initial topography with two similar ‘peaks’ of steep slopes  
449 frequency (Fig. 8C). We observe maximum slopes around 3 m/m (~70°) between 2700 and the  
450 catchment crestline (~3500 m), and in a narrower elevation range from around 2000 to 2400 m (Fig.  
451 7D). On the contrary, the fluvial catchment differs from the other catchments due to the relative  
452 homogeneous distribution of slopes with elevation (Fig. 7G; Fig.S3). Throughout the simulations,  
453 catchment slopes exceeding the friction angle at 0.7 m/m are affected by landslides, especially in the  
454 glacial catchment where significant changes can be noticed already after only 10 kyr simulation (Fig.  
455 7B,E). Overall, after 100 kyr simulation, landslide activity has erased most of the steep slopes (almost  
456 three time less steep slopes, for high elevations, at the end of the simulation, Fig. 8C) , i.e. above ~1.5  
457 m/m, reducing significantly in turn the bimodal distribution of elevation for the steep slopes (Figs. 7C,F  
458 & 8C). The maximum catchment elevation has decreased for the glacial and intermediate glacial-fluvial  
459 catchments, while it remains approximately constant for the fluvial catchment after 100 kyr of  
460 simulation.

461 During the simulations, we also observe a progressive increase in slope frequency slightly below 1 m/m  
462 (i.e, 45°), concentrated around 2600 – 3200 m, 2400 – 3000 m and 1900 – 2600 m for the glacial,  
463 intermediate glacial-fluvial and fluvial catchments, respectively (Figs. 7C,F,I & 8B). This new slope  
464 distribution evidences the shift from the initial steep slopes to final intermediate slopes that are closer  
465 to the input internal friction.

466

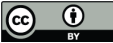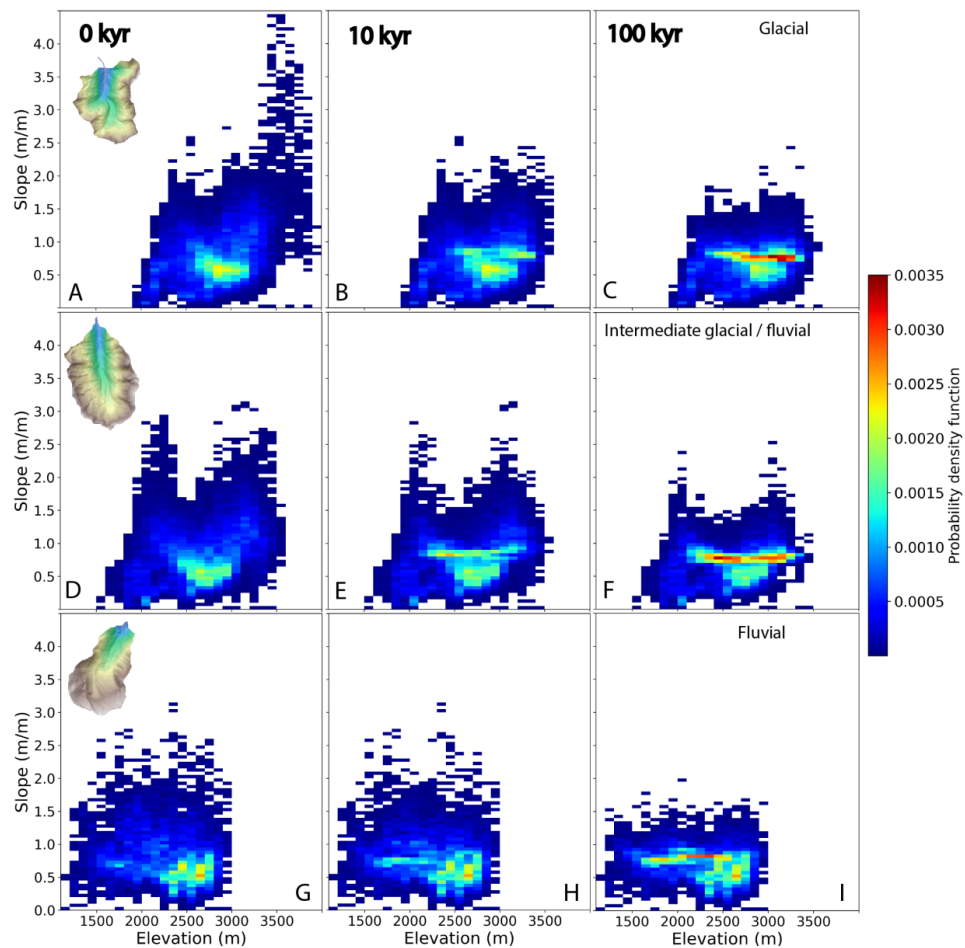

467

468 **Figure 7: 2D histograms of the catchment slope distributions (color scale) with elevation. The temporal evolution of**  
469 **catchments slopes and elevations during simulations is monitored at three different time steps: 0, 10, and 100 kyr (left,**  
470 **middle and right, respectively). Each row shows model results for a particular catchment: Pilatte (glaciated, A-B-C),**  
471 **Etages (intermediate glacial-fluvial, D-E-F), and Pisse (fluvial, G-H-I). For all three catchments, steep slopes are erased**  
472 **and catchment slopes tend toward more homogeneous slopes around the input internal angle of friction (0.7 m/m, i.e.**  
473 **35°).**

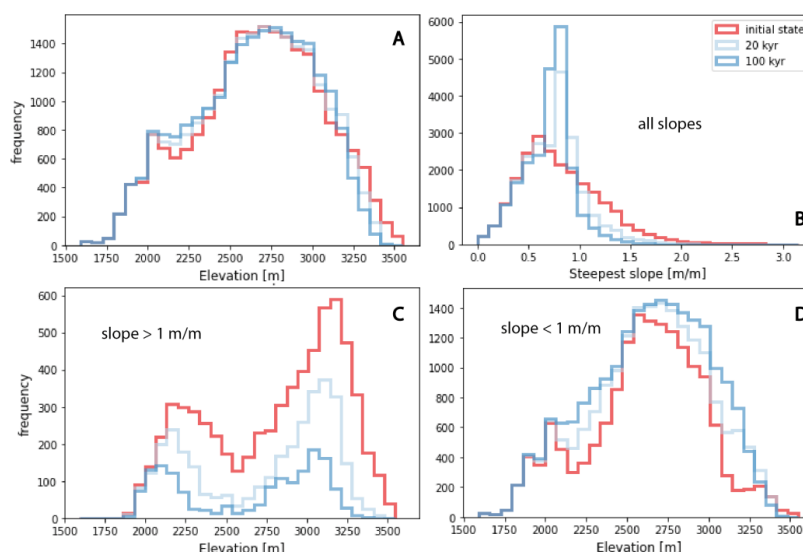

**Figure 8:** For the Etages catchment (intermediate glacial-fluvial), temporal evolution of (A) elevation distribution, (B) slope distribution, (C-D) Elevation distribution with slope threshold values (above or below 1m/m). The colors illustrate the initial topography (red), an intermediate stage (20 kyr – light blue line) and the final topography (100 kyr – dark blue).

### 4.3 Temporal distribution of landslides

We now investigate the relationship between topographic changes and landslide activity (Fig. 9). Here, we identify each landslide by its time of occurrence and its triggering location, corresponding to its lowest elevation (Fig. 9). First, our results highlight the bimodal elevation distribution of the simulated landslides, roughly above 2800 m and below 2400 m, which appears persistent with time for the glacial and intermediate glacial-fluvial catchments (Fig. 9A,B). These two catchments also show an intense landslide activity for the first 20 kyr of simulation, with an apparent progressive decay with time. Large landslides occur throughout the 100 kyr of simulation time, illustrating the stochastic nature of landslide occurrence in HyLands simulations. These observations are supported by the cumulative distribution of landslides volume through simulation time (Fig. 10A-C). For the glacial and intermediate glacial-fluvial catchments, more than half of the total landslide volume is predicted before 20 kyr. However, the cumulative number of landslides increases with time for these catchments. This discrepancy between the total landslide volume and the number of landslides may illustrate the preferential occurrence of large landslides within the first 20 kyr. This interpretation is supported by the change in the probability density function of the landslide volumes after 20 kyr simulation time (Fig S5). For these two (intermediate) glacial catchments, the difference in the exponent of the power-law scaling indicates the higher frequency of large landslides within the 20 kyr of simulation time (Fig 7G-H). We do not observe this pattern for the fluvial catchment (Fig S4 C, F), although the largest landslides are still predicted during the first 20 kyr of simulation time.

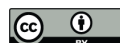

Another interesting result is the inverse relationship between the predicted landslide volume and the number of landslides at different catchment elevations: at low elevations (<2700 m), landslides are less frequent but large landslides are overrepresented; whereas at high elevations (>2700 m), landslides are more frequent but large landslides are underrepresented. This assessment is particularly true for the Pilatte (glacial) and Etages (intermediate glacial-fluvial) catchments (Fig. 10A-B). For instance, the Pilatte catchment (Fig. 10A) displays twice more landslide occurrences at high elevations (>2700 m), with only a slightly larger eroded volume above than below 2700 m elevation. Observations are significantly different for the fluvial catchment as the landslides are rather homogeneously distributed in the catchment (Fig. 9C). However, the high occurrences of landslides in the first 20 kyr are still noticeable (Fig. 10C) and large landslides tend to occur preferentially at low elevation (<2200 m).

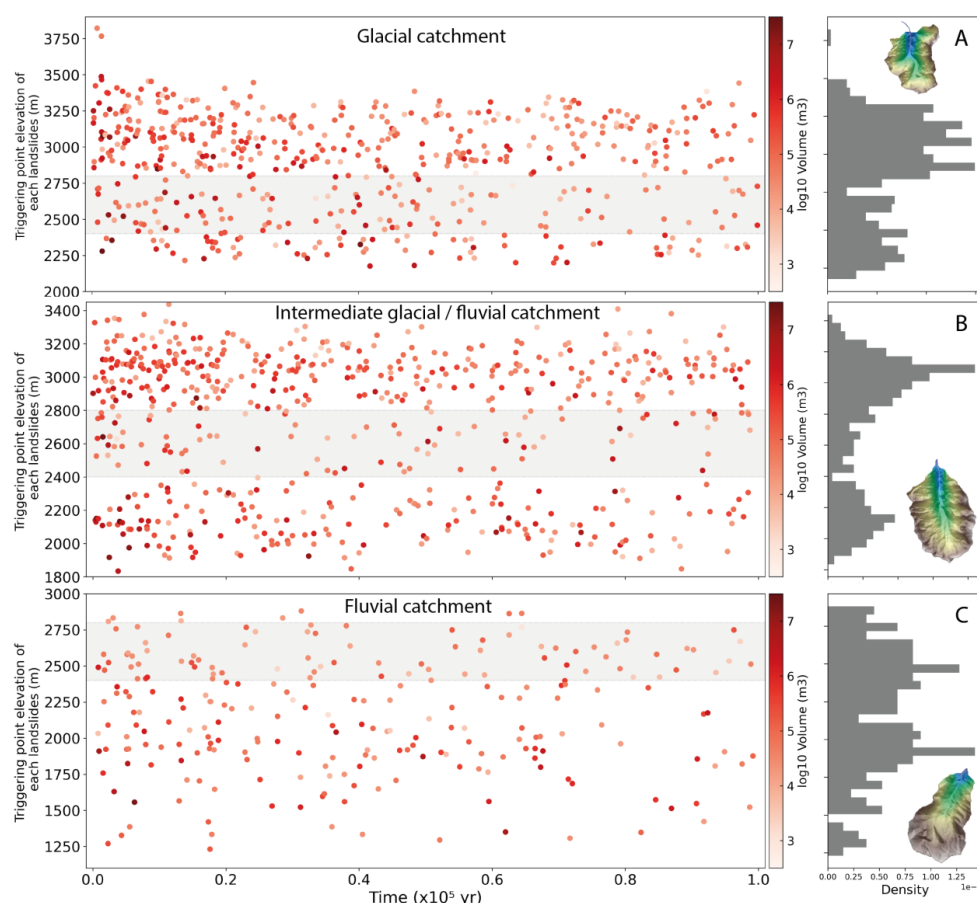

510

511 **Figure 9:** Triggering point elevation of each predicted landslide over the total simulation time (100 kyr) and their  
 512 associated volume (red gradient colors). The landslide distributions with elevation (right panels for distributions)  
 513 appear bimodal for the glacial and intermediate catchments (A - B) with two main elevation ranges around 2100 and  
 514 3000 m and no clear altitudinal distribution of predicted landslides for the fluvial catchment (C).



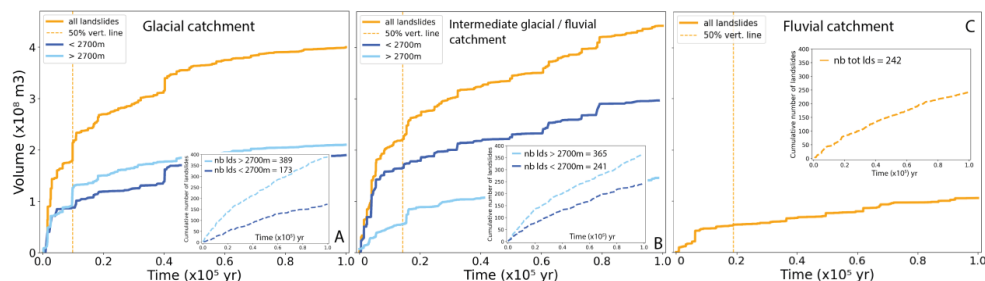

515

516 **Figure 10:** Cumulative distribution of the predicted landslide volumes over the total simulation time (100 kyr) for the  
517 glacial (Pilatte - A), intermediate glacial/fluvial (Etages - B) and fluvial (Pisse - C) catchments. The orange lines are the  
518 total cumulative landslide volumes, while the blue lines display the predicted cumulative volumes for landslides located  
519 above (light blue) and below (dark blue) an elevation threshold of 2700 m. The yellow vertical dashed lines indicate the  
520 simulation time when 50% of the total landslide volume is reached. Insets show the cumulative number of landslides  
521 generated during the simulation time for the two defined elevation classes.

522

#### 523 4.4 Temporal evolution of landslide erosion rate

524 The term ‘erosion rate’ describes here only the predicted erosion induced by landslides and averaged  
525 over the catchment area. For each studied catchment, we compute the evolution of the catchment-  
526 averaged erosion rates using a 2-kyr time window, providing different statistics: mean, median, 25<sup>th</sup> and  
527 75<sup>th</sup> percentiles of catchment-averaged erosion rates (Fig. 11). This temporal window emphasizes the  
528 general long-term trend of the predicted erosion rate by smoothing its high-frequency variations related  
529 to the stochasticity of landslide occurrence (Fig. S5). For all three catchments, the catchment-averaged  
530 erosion rates vary roughly between  $10^{-5}$  and  $10^{-1}$  mm/yr when at least one landslide is triggered during  
531 the time window. The predicted mean erosion rate is always significantly higher than the median erosion  
532 rate (almost 10 times at the beginning of the simulation and around 100 times after 100 kyr of simulation  
533 time), but the progressive decreasing trend is observed for both two statistical measures. In addition, the  
534 25<sup>th</sup> percentile rapidly becomes null, highlighting that the catchment-averaged erosion rate is driven by  
535 large but infrequent landslides.

536 The Pilatte (glacial) catchment (Fig. 11A) shows a particular high mean erosion rate, above 1 mm/yr,  
537 with a rapidly decreasing trend during the first 10 kyr. Then, the mean erosion rate decreases more  
538 slowly until 60 kyr and gets roughly constant at 0.1-0.2 mm/yr over the last 40 kyr of simulation. A  
539 similar trend is observed for the Etages (intermediate glacial-fluvial catchment, Fig. 11B), but the initial  
540 erosion rate is ~1 mm/yr and apparently lower than for the Pilatte (glacial) catchment. On the contrary,  
541 the Pisse (fluvial) catchment (Fig. 11C) shows a progressive decrease in the mean erosion rate, from  
542 ~0.6 to 0.06 mm/yr after 60 kyr of simulation, with no observed peak in erosion rate at the beginning of  
543 the simulation. The median value for the fluvial catchment reaches rapidly zero within the first 20 kyr  
544 of simulation, illustrating the lower frequency of landslide occurrence compared to the glacial and  
545 intermediate glacial-fluvial catchments. Overall and for all studied catchments, predicted landslide

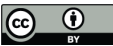

erosion rates decrease by about an order of magnitude over 100 kyr, illustrating the progressive erasing  
of steep slopes associated to glacial morphological features.

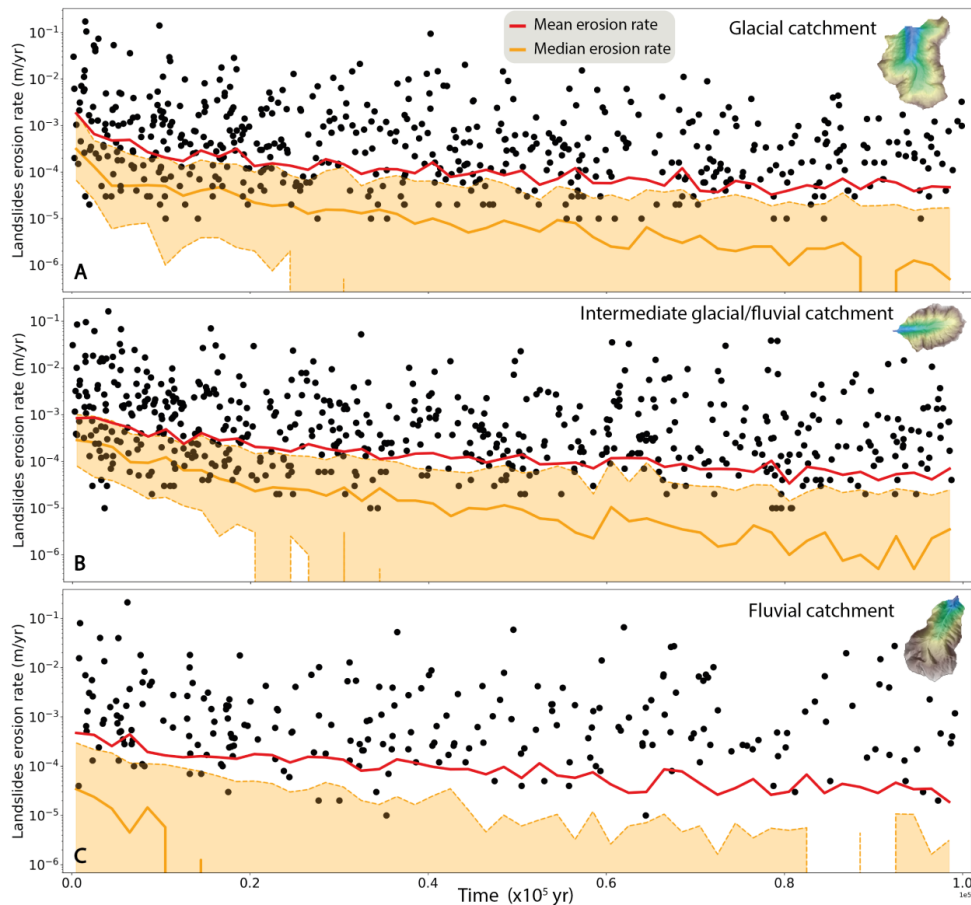

**Figure 11:** Temporal evolution of the landslide (catchment-averaged) erosion rate for the three studied catchments: A) Pilatte (glacial), B) Etages (intermediate glacial-fluvial). And C) Pisse (fluvial). Black dots illustrate the non-zero landslide erosion rates for each time step of one individual simulation, while red and orange lines depict respectively the mean and median (with 25<sup>th</sup> and 75<sup>th</sup> percentiles as dashed orange lines) erosion rates compiled from 20 individual simulations (with a smoothing temporal window of 2 kyr). For all catchments, the simulated landslide erosion rates decrease over time, especially during the first 20 kyr of simulation time, with different temporal trends depending on the catchment.

## 5. Discussion

### 5.1 Model limitations

Our landscape evolution model using HyLands has been designed to explore the hypothesis that landsliding represent a dominant geomorphological agent during postglacial periods. Our numerical simulations succeed in reproducing a pulse of landslides activity during the postglacial period and its



complex (non-homogeneous) impact on catchment hypsometry and slopes. However, this reduced-complexity model represents a simplified version of real hillslope dynamics, with limitations regarding its ability to predict in details all the richness of natural landforms, especially under the constraint of long simulation time (Tucker & Hancock, 2010). Therefore, we made several modeling choices (see Sections 3.2 and 3.3) to minimize potential feedback loops and interaction between erosion processes, which may have impacted our results as discussed below.

### 5.1.1 Missing processes: uplift, fluvial erosion and transport

As mentioned earlier, the model does not account for the impact of uplift, which can be considered as a limitation. Given the present-day uplift rate in the western European Alps, around 1 mm/yr (Nocquet et al., 2016; Sternai et al., 2019), the total uplift over the simulation period (100 kyr) would be around 100 m. This theoretical uplift value is of the same order of magnitude than the average decrease in elevation caused by landslide erosion in the Etages (intermediate glacial-fluvial) and Pisse (fluvial) catchments (Figs. 6-7). In the Pilatte (glacial) catchment, the mean erosion is around 26 m, with maximum cumulated erosion of ~500 m. Therefore, integrating rock uplift in the model, from either geodynamics, tectonic activity or glacial isostatic rebound (Sternai et al., 2019), could counterbalance the overall decrease in catchment elevation observed in our results. Indeed, post-glacial rebound can occur at km scale, promoting local rock uplift and potentially considered to be a significant factor in triggering landslides in some regions (É. Cossart, 2013). In addition, rock uplift has also been proposed as modulating the post-glacial geomorphic response and landscape transition from glacial to fluvial states (Prasicek et al., 2015), ~~rock uplift~~ allowing faster relief turnover times. In addition to uplift, tectonic activity could be associated with seismicity, another well-known triggering factor for landslides (Keefer, 1984; McColl, 2012). However, our approach stays appropriate to assess the hillslope stability over 100 kyr, which is largely dependent on alpine topography, inherited from glacial-interglacial cycles, and mechanical strength. The impact of local earthquakes would mostly result in changing the timing of landslide activity, not the total volume of landslides.

The catchment-averaged erosion rate of 1 mm/yr, derived from published cosmogenic nuclide data (Delunel et al., 2010) and used for the return time calibration, is integrating a large fluvial network with multiple erosion processes (fluvial, hillslope, landslide) at the scale of the Ecrins massif. **Considering effective sediment connectivity in the catchment and only landsliding to derive our catchment erosion rate, 1 mm/yr is likely to be an end member minimum value for our simulations.** Therefore, we ran a supplementary simulation with a lower cohesion value (20 kPa) while keeping the same return time (150 kyr), leading overall to a higher erosion rate (about 2-3 mm/yr, Fig. 5). The simulation results show a globally higher frequency of landslides, but with similar patterns in landslide occurrence, topographic changes and temporal trend in erosion rate (Fig.S6).



597 Finally, we did not include fluvial erosion and sediment export in our simulations. Ignoring sediment  
598 transport over a long timescale (100 kyr), **integrating multiple glacial-interglacial periods**, is a strong  
599 model limitation for alpine erosion dynamics (Schlunegger & Hinderer, 2003). Indeed, sediment transfer  
600 dynamics over the Quaternary period **is** associated with glacial dynamics (Antoniazza & Lane, 2021),  
601 coupling between hillslopes and channels (Hovius et al., 2000), fluvial incision (Leith et al., 2018; Valla  
602 et al., 2010) and potential transient sediment storage (Buechi et al., 2018). Rivers are also considered as  
603 the main agent of sediment transport during interglacial period (M. N. Koppes & Montgomery, 2009;  
604 Pitlick et al., 2021). Fluvial incision also leads to a lowering of the base level, which in turn creates more  
605 steep slopes at the hillslope foot. These changes **participate** to renew the landslide potential of these  
606 transient landforms. However, in this study we modeled a single interglacial period and provide a focus  
607 solely on hillslopes dynamics (i.e. no fluvial dynamics); both arguments result in a lower influence of  
608 the sediment dynamics for our results.

#### 609 **5.1.2 Model parametrization**

610 Our modeling strategy and parameterization have inherent limitations, such as our initial input DEM  
611 (modern alpine topography) with a low resolution (25 m). Such resolution allows long simulation  
612 periods in a reasonable simulation time with the capability to still capture first-order erosion processes  
613 and topographic changes (Campforts et al., 2022). However, **this relatively low resolution may hinder**  
614 **potential small-scale topographic roughness** that could influence both landslide occurrence and  
615 magnitude. In addition, we ran our model simulations over 100 kyr, which is longer than any interglacial  
616 period during the Quaternary.

617 Another strong assumption is to ignore sediment deposition on the resulting simulated topography.  
618 Landslides are among **th** most efficient processes for producing sediments (Keefer, 1984) in  
619 mountainous areas, which can then be available for transport from hillslopes to the drainage network.  
620 The sediment connectivity (Cavalli et al., 2019), especially for bedload sediment, from hillslopes to  
621 channels is a key indicator to quantify sediment yields and morphological changes along the source-to-  
622 sink profile (Comiti et al., 2019; Hooke, 2003; Lane et al., 2017; Micheletti et al., 2015). Thus, we  
623 explore the potential feedbacks of sediment deposition on landslide activity by testing the Hylands  
624 model with a null fine fraction parameter ( $F_f = 0$ ), i.e. with **a**-complete storage of landslide-produced  
625 sediment in the catchment. **Coarse** sediments are spread over the hillslopes, i.e. downstream of the  
626 landslide source, following a non-linear and non-local deposition law (Carretier et al., 2016). This  
627 deposition term depends on the transport distance which is driven by the critical slope, settled here equal  
628 to the tangent of the angle of internal friction ( $\phi$ ) (Campforts et al., 2022; Carretier et al., 2016). This  
629 new setup is the opposite of our main analysis ( $F_f = 1$ , Section 3.2), where we assumed **a**-perfect sediment  
630 connectivity within the catchment, leading to instantaneous sediment export. Simulated sediment  
631 storage in the catchment ( $F_f = 0$ ) causes a slight increase in landslide occurrence, especially at low  
632 elevations (<2700 m). We interpret this increase as a remobilization of the sediment deposits, which



633 results in new landslide locations compared to previous simulations. The simulated deposition patterns  
634 are indeed mainly located in the valley bottom (Figs. S7-8). When the slopes of the deposits become  
635 greater than the internal angle of friction (0.7m/m, i.e. 35°), landslides can then occur. These landslides  
636 trigger in the sedimentary cover may also explain the slight ~~landslides increase in the shouldering~~  
637 elevation zone (2400 – 2800 m, Figs. S7-8). However, the spatio-temporal landslide activity remains  
638 roughly similar to our previous simulations. Note that we have not computed the denudation rate without  
639 exported fine sediment because it would not be possible to compare it with measured value.  
640 Finally, our model parameterization assumes spatially uniform model parameters both within and  
641 between the three catchments. We used a single set of calibrated cohesion and internal angle of friction  
642 values (Figs. 3-4), without differentiation based on lithology, vegetation cover, elevation or glacial  
643 cover. This assumption may limit the model capacity in capturing the complex terrain roughness of  
644 ~~alpine modern~~ topographies, which may be a factor in increasing rock resistance to sliding in natural  
645 environments. For example, in our catchment, the effect of the tree cover at low elevations **may not be**  
646 **apprehended by the model**. Thus, **the expected reduction in landslide occurrence due to root**  
647 **reinforcement or changes in soil moisture (Muñoz et al., 2016)** is not simulated. In addition, the role of  
648 high-elevation permafrost, its spatial variability and temporal evolution, on landslide activity (Magnin  
649 et al., 2017), is not captured by our simulations.

## 650 **5.2 The spatio-temporal landslide activity over the Quaternary period**

651 **The glacial inheritance of the alpine landforms, with glacial cirques, U-shaped and hanging valleys (Fig.**  
652 **3), is still a current field of investigation in terms of their formation through multiple glacial cycles of**  
653 **the Quaternary (Seguinot & Delaney, 2021) and their persistence during post-glacial periods (e.g.**  
654 **Herman & Braun, 2008; Prasicek et al., 2015). The relative contribution of glacial and fluvial erosion**  
655 **to Quaternary relief evolution is still debated because of the difficulties to quantify erosion over glacial-**  
656 **interglacial timescales (Fox et al., 2015; Shuster et al., 2005; Sternai et al., 2013; Valla et al., 2011).**  
657 **Moreover, some studies (M. N. Koppes & Montgomery, 2009; Leith et al., 2014, 2018; Montgomery &**  
658 **Korup, 2011) have argued that Late-Pleistocene glaciations had only a limited impact on Alpine**  
659 **topography, recent alpine relief evolution being then mainly driven by fluvial and hillslope processes**  
660 **during interglacial.** In this context, our numerical results bring some insights into the role of these  
661 hillslope processes in the transition from glacial to fluvial morphologies.

### 663 **5.2.1 Spatial landslide distribution and glacial imprint**

664 The present-day catchment morphologies (Fig. 2) leave no doubt about the significant role of the glacial  
665 processes in shaping the investigated landscapes in the Ecrins massif (Fig. 1). However, our **initial**  
666 **hypothesis about the capacity of landslides to erase this glacial topographic inheritance over the last**  
667 **post-glacial period** is only partly validated by the simulation results.



668 First, the spatial landslide activity pattern (Fig. 9) reveals that **the glacial morphologies** are more subject  
 669 to mass wasting processes. The steep slopes generated by glacial erosion along the U-shaped valley  
 670 walls and at high elevation (crestlines and nunataks) produce a bimodal distribution of landslides with  
 671 elevation, while the shouldering (Fig. 3), i.e., the gentler slope interval at mid-slope, ~~induces a weak~~  
 672 ~~landslides~~ activity. Therefore, our simulation results suggest that the transition from U-shaped to V-  
 673 shaped valleys, as evidenced by the glacial (Pilatte) and fluvial (Pisse) catchments (Fig. 3), is  
 674 highlighting the reshaping of the inherited glacial landscape through hillslope processes. However, the  
 675 bimodal distribution of landslides with elevation is still noticeable after 100 kyr of simulation time (i.e.,  
 676 roughly ten times longer than **the deglaciation period for the area**). Moreover, the **number of landslides**  
 677 and their spatial clustering is still significant for the glacial and intermediate glacial-fluvial catchments  
 678 compared to the landslide pattern in the fluvial catchment (Pisse), which shows a more uniform  
 679 distribution of landslides on hillslopes (Fig. 9). Thus, if the landslide activity and its spatial distribution  
 680 can be considered as indicators of the hillslopes transition, **our modeling results suggest that the glacial**  
 681 **and intermediate glacial-fluvial catchments have not yet completed their post-glacial transition after 100**  
 682 **kyr simulation.**

683 Second, the landslide volume distributions also illustrate a specific dynamics of mass wasting events in  
 684 formerly glaciated catchments. For **the upper catchments (glacial and intermediate glacial-fluvial)**, our  
 685 modeling results suggest that landslides are more frequent at higher elevations, near the crestlines, than  
 686 at lower elevation near the valley bottoms (Fig. 10). This is consistent with the recent deglaciation of  
 687 the upper catchments. **Indeed, nunataks and crestlines in this interior part of the massif may still benefit**  
 688 **from the stabilizing role of permafrost.** Thus, the higher elevations of the catchment (i.e., above the  
 689 trimline) still display steep and sharp slopes. Under a warming climate and the degradation of  
 690 permafrost, these high-elevation and steep hillslopes will potentially be more and more prone to  
 691 periglacial erosion processes (as it is already the case for the intermediate glacial-fluvial catchment). In  
 692 parallel, our simulations predict large landslides at the lower elevations (Figs. 9 & 10). These results are  
 693 consistent with the effect of debuttreassing (i.e., stress variations resulting from glacial unloading) along  
 694 the U-shaped valley wall following glacial recession (e.g. E. Cossart et al., 2008). This is also supported  
 695 by the temporal clustering of the large landslides in the first 20 kyr. Yet, the occurrence of large  
 696 landslides, due to their stochastic nature, remains occasional afterwards, which is consistent with other  
 697 studies (Ivy-Ochs et al., 2017; Schwartz et al., 2017; Zerathe et al., 2014).

698 Therefore, the persistence of landslide activity in the glacial and intermediate catchments, even after  
 699 long simulation times, highlights that hillslope processes such as landslides, in response to glacial  
 700 topographic inheritance, may not be the only factor explaining the fluvial morphology observed in our  
 701 downstream catchment (Pisse).

702





## 703 5.2.2 Temporal landslide activity and transient topography

704 Here, we discuss our initial hypothesis, that all the studied catchments had the same glacial topographic  
 705 imprint, and show that the three catchments have a distinct erosion dynamics explained by diachronous  
 706 landslide activity following different glacial retreat times (Fig. 1). Following the previous spatial  
 707 analysis (5.2.1), the observed temporal decrease in landslide occurrence and in predicted erosion rates  
 708 over the first ~20 kyr (Fig. 11) reflects a decline in the proportion of unstable slopes during the post-  
 709 glacial period. The faster erosion modeled for the glacial and intermediate glacial-fluvial catchments,  
 710 compared to the fluvial catchment, highlights the role of landsliding as a main geomorphological agent  
 711 during the transition from glacial to inter-glacial conditions. This initial and gradual pulse of erosion,  
 712 which differs between the studied catchments, reflects the distinct topographic states with respect to  
 713 landslide susceptibility. The glacial catchment (Pilatte) has not experienced intense periglacial  
 714 processes, such as landslides, for a sufficiently long period, resulting in this high erosion rate following  
 715 debuttressing of unstable glacial hillslopes (E. Cossart et al., 2008). The slowing down of erosion rates  
 716 in the two upper catchments (glacial and intermediate glacial-fluvial) is also illustrating this long-term  
 717 transitional stage, in which hillslope processes may continue to control sediment production, but at a  
 718 smaller pace. With few landslides occurring at the end of our simulations, and associated to a low erosion  
 719 rate, the Pisse (fluvial) catchment could be considered at the end of its transient phase and close to “post-  
 720 glacial topographic steady-state” dominated by hillslope processes (i.e. no to few slope destabilizations).  
 721 The modelled pulse of erosion for the postglacial phase implies that the Late Pleistocene period, marked  
 722 by the transition from glacial to hillslope processes, has reactivated alpine landforms by reshaping new  
 723 steep and unstable hillslopes along the U-shaped valleys or in the cirque areas. With its particular  
 724 morphologies (Fig. 2), the glacial inheritance sustains the landslide erosion potential and may become  
 725 an indicator of the glacial impact on alpine topographies. However, our model results also show that  
 726 simulated landsliding over 100 kyr (duration exceeding the typical interglacial period) is not sufficient  
 727 for the full transition from a glacial to a fluvial steady-state topography. Indeed, the simulated landslide  
 728 activity - the bimodal landslide distribution (Fig. 9) - and the associated erosion rate are still significant  
 729 at the end of our 100-kyr simulations, meaning that the hillslope system alone requires longer timescales  
 730 than the typical Milankovitch cycle to reach a steady-state topography (i.e. a topography without  
 731 hillslope instabilities). A longer simulation of 1 million years shows that a plateau is reached in the first  
 732 100kyr but that the erosion rate decreases gradually until 400 kyr (Fig. S9). At this time, the probability  
 733 of failure is so small (probably because of no slope above the internal angle of friction), that the  
 734 landslide-derived erosion rate is close to zero.

735

736 First, this observation can be compared to fluvial processes, which also have long timescales for  
 737 reaching steady-state topographic conditions (Whipple, 2001). Since hillslope processes are also largely  
 738 contributing to sediment production in alpine settings, the topographic response time to landsliding may  
 739 play a role in the sediment cascade transfer which in turn would influence fluvial dynamics and erosion



rates. Second, this relatively long activity of the hillslope system during the interglacial period – calibrated from cosmogenic-nuclide derived erosion rates (section 3.3.3) – is also consistent with the absence of uplift and fluvial incision in our modeling approach. Including these model components in our simulations may decrease the duration of post-glacial landsliding activity for the studied catchments, uplift promoting faster response of the hillslope-fluvial system as observed for natural settings (Prasicek et al., 2015).

Given the long persistence of landsliding from our simulations (>100 kyr), the observed differences in landslide activity between the glacial/intermediate and fluvial catchments cannot be fully explained by the time lag in glacier retreat and the duration of the interglacial period (~10 kyr, Fig. 1). We thus propose that the glacial imprint may have been less intense in the fluvial (Pisse) catchment than in the glacial and intermediate glacial-fluvial catchments (Pilatte and Etages). This confirms the non-uniform impact of glacial processes on mountainous landforms (Herman et al., 2011; Sternai et al., 2013; van der Beek & Bourbon, 2008), resulting from different ice extent/thickness and erosion efficiency over glacial cycles (Pedersen & Egholm, 2013; Seguinot & Delaney, 2021).

### 5.3 Landsliding and topographic mountain evolution

#### 5.3.1 The glacial/ interglacial transition: a hot moment for alpine erosion

Glacial erosion also does not appear to be spatially-uniform throughout the glacial period (Seguinot & Delaney, 2021), and field studies have shown increased glacial erosion during the deglaciation period (M. N. Koppes & Montgomery, 2009). Therefore, hot moments of glacial dynamics occur at the end of the glacial period. Following this period, our model results suggest an additional pulse of rapid erosion, associated to landsliding, at the onset of the interglacial period. Therefore, the glacial-interglacial transition seems to concentrate the most rapid rates of erosion and in turn, may participate strongly to landscape changes and topographic relief evolution in alpine settings.

However, our simulations were carried out on the current topography, which is already the results of 2 million years of successive glacial-interglacial cycles. Thus, the “hot-moment” of erosion that we observe in the post-glacial period occurs in U-shaped valleys that are already well marked. As landslide potential is maintained by steep slopes, this shape-of-mature-glacial-valley may increase landslides activity compared with early Quaternary activity and increase in the same time the key role of hillslopes processes in shaping long-term mountain topography (Burbank et al., 1996; Korup et al., 2007; Larsen & Montgomery, 2012).

#### 5.3.2 Toward a “landslide buzzsaw” ?

The final landslide patterns from our simulations show interesting similarity with the morphological changes associated with the glacial buzzsaw (Fig. 6). Previous studies have highlighted the impact of glacial erosion on the mountain elevations and reliefs, referred as the ‘glacial buzzsaw’ (Egholm et al., 2009; Herman et al., 2013, 2021; Mitchell & Montgomery, 2006; Thomson et al., 2010; Tomkin &



Braun, 2002). This theoretical concept, based on the observed correlation between the position of the Equilibrium Line Altitude (ELA) and the mean and maximum height of mountains (Egholm et al., 2009), suggests that glaciers may have a strong control on mountain relief. In fact, by shaping cirques, glaciers create steep slopes at high elevations (Brozović et al., 1997), increasing erosion above the ELA. Although the “glacial buzzsaw” might be more complex in specific mountain ranges (Banerjee & Wani, 2018; Scherler, 2014), a concentration of surface area is usually observed around the ELA elevation (Egholm et al., 2009, 2017; Liebl et al., 2021; Pedersen et al., 2010; Prasicek et al., 2020; Steer et al., 2012).

For the three studied catchments, most of the landslide scars occur close to the catchment boundaries, i.e. along steep rock walls or ~~on sharp ridges of the catchments~~. In addition, we ~~observed~~ a decrease in the maximum catchment elevation and **a concentration of hillslopes (around the angle of friction) at specific elevations (Fig. 7)**. Thus, our simulations highlight that **the topographic slopes above the ELA seem strongly affected by landslide activity**, appearing as a potential ‘landslides buzzsaw’ during interglacial period. This concept may not be sustainable over long time periods since landslide activity will limit the occurrence of steep hillslopes. However, over Quaternary glacial cycles, successive glaciations and associated glacial/paraglacial erosion may sustain steep hillslopes at high elevations, further promoting the “landslide buzzsaw” during subsequent interglacial periods as proposed for instance for the European Alps (Delunel et al., 2020; Norton et al., 2010). This coupling between glacial and hillslope processes would be reinforced by the topographic impact of landsliding, affecting steep hillslopes at high elevations and **producing larger low-relief areas at or above the ELA** (Fig. 6). This landscape conditioning would favor glacier development and erosion during the next glacial period, maintaining or enhancing the potential for glacial buzzsaw (Pedersen & Egholm, 2013).

## 6. Conclusions

The successive glacial-interglacial transitions during the Quaternary period have promoted landscape disequilibrium between ~~the~~ inherited topography and the dominant geomorphological processes. The HyLands model was used to study how post-glacial landslides shape alpine landscapes. We focused on landslide rates, locations, and the influence of interglacial processes on long-term landscape evolution.

We modeled the topographic evolution of three distinct catchments located in the Ecrins massif (French Alps, Fig.1), that we identified as glacial, intermediate glacial-fluvial and fluvial catchments based on their morphological characteristics (Fig. 2). For these three catchments, the highest and steepest slopes are the first topographic areas impacted by landslides (Fig. 6). Topographic changes are particularly pronounced in the glacial and intermediate catchments, where we observed a bimodal distribution of landslides corresponding to the bimodal distribution of steep slopes generated by glacial erosion. In this case, the high and steep slopes **are completely erased**, inducing a decrease in slopes slightly greater than the internal angle of friction (Fig. 7, 8&9). This control of hillslope processes on the maximum mountain



812 elevations and the topographic reshaping at particular elevations leads us to propose similarities between  
813 the ‘glacial buzzsaw’ concept and postglacial landslides activity.

814 The simulation results also highlight a high frequency of landslides during the first 20 kyr of our  
815 simulations (Fig. 9&10), which is associated with higher erosion rates. Landslide activity and intensity,  
816 and the resulting erosion rates, at the beginning of each simulation is following the morphological  
817 gradient (from glacial to fluvial) observed in our three catchments (Fig.11). Therefore, glacial  
818 topographic inheritance induces an intense post-glacial landslide activity, leading in turn possibly to  
819 regular ‘hot-moments’ of landscape dynamics over the Quaternary.

820 Our study also concludes that hillslopes processes, such as landslides, alone cannot drive the transient  
821 shift from glacial to fluvial morphology during the interglacial periods. The intensity of glacial erosion  
822 and the extent of glacial advance may have been lower in downstream areas (i.e. in this study, within  
823 the fluvial catchment), which may have led to a faster transition from glacial landscape to a fluvial one.

824 Finally, this study provides a basic but sound model for understanding landslide dynamics and their  
825 impact on alpine landscape evolution. Additional components could be incorporated to enhance the  
826 model, such as fluvial processes, permafrost degradation or non-uniform rock properties to better  
827 capture the complex interactions occurring in mountain environment. In a future work, we intend to  
828 model the interactions between hillslope processes and glacial processes over multiple glacial-  
829 interglacial cycles to better estimate their relative contributions.

830

831 *Author contributions.* CA conducted the model calibration and analysis with support from BC. CA, PS  
832 and PV conceived the study and developed the methodology. All the authors were involved in writing  
833 and reviewing the paper.

834 *Competing interests.* The contact author has declared that neither they nor their co-authors have any  
835 competing interests.

836 *Acknowledgements.* The authors would like to thanks helpers who make this study easier, especially  
837 Diego Cusicanqui for the lidar extraction tool (<https://doi.org/10.5281/zenodo.13832516>) and Xavier  
838 Robert for his help in adapting the simple-swath Python tool  
839 (<https://doi.org/10.5281/zenodo.13771754>). Thanks to Boris Gailleton for his advice on coding and to  
840 Dimitri Lague for his insightful comments on landslide dynamics.

841 *Financial support.* This research has been supported by the H2020 European Research Council (grant  
842 no. 803721). PGV acknowledges support from the French ANR-PIA programme (ANR-18-MPGA-  
843 0006). BC acknowledges support from the Dutch Research Council (NWO) under the grant  
844 OCENW.M.23.027.



845 **References**

- 846 Anderson, R. S., Molnar, P., & Kessler, M. A. (2006). Features of glacial valley profiles simply  
847 explained. *Journal of Geophysical Research: Earth Surface*, 111(F1).  
848 <https://doi.org/10.1029/2005JF000344>
- 849 Antoniazza, G., & Lane, S. N. (2021). Sediment yield over glacial cycles : A conceptual model. *Progress*  
850 *in Physical Geography*, 45(6), 842-865. <https://doi.org/10.1177/0309133321997292>
- 851 Ballantyne, C. K. (2002). Paraglacial geomorphology. *Quaternary Science Reviews*, 21(18), Article 18.  
852 [https://doi.org/10.1016/S0277-3791\(02\)00005-7](https://doi.org/10.1016/S0277-3791(02)00005-7)
- 853 Banerjee, A., & Wani, B. A. (2018). Exponentially decreasing erosion rates protect the high-elevation  
854 crests of the Himalaya. *Earth and Planetary Science Letters*, 497, 22-28.  
855 <https://doi.org/10.1016/j.epsl.2018.06.001>
- 856 Barféty, J. C., Pécher, A., Bambrier, A., Demeulemeester, P., Fourneaux, J. C., Poulain, P. A., Vernet, J.,  
857 & Vivier, G. (1984). Notice explicative de la feuille Saint-Christophe-en-Oisans à 1/50000.  
858 *Bureau de Recherches Géologiques et Minière: Orléans.*
- 859 Barnhart, K. R., Hutton, E. W. H., Tucker, G. E., Gasparini, N. M., Istanbuluoglu, E., Hobley, D. E. J.,  
860 Lyons, N. J., Mouchene, M., Nudurupati, S. S., Adams, J. M., & Bandaragoda, C. (2020). Short  
861 communication : Landlab v2.0: a software package for Earth surface dynamics. *Earth Surface*  
862 *Dynamics*, 8(2), 379-397. <https://doi.org/10.5194/esurf-8-379-2020>
- 863 Bennett, G. I., Molnar, P., Eisenbeiss, H., & McArdell, B. w. (2012). Erosional power in the Swiss Alps :  
864 Characterization of slope failure in the Illgraben. *Earth Surface Processes and Landforms*,  
865 37(15), 1627-1640. <https://doi.org/10.1002/esp.3263>
- 866 Blondeau, S., Gunnell, Y., & Jarman, D. (2021). Rock slope failure in the Western Alps : A first  
867 comprehensive inventory and spatial analysis. *Geomorphology*, 380, 107622.  
868 <https://doi.org/10.1016/j.geomorph.2021.107622>



- 869 Brardinoni, F., & Hassan, M. A. (2007). Glacially induced organization of channel-reach morphology in  
870 mountain streams. *Journal of Geophysical Research: Earth Surface*, 112(F3).  
871 <https://doi.org/10.1029/2006JF000741>
- 872 Brocklehurst, S. H., & Whipple, K. X. (2006). Assessing the relative efficiency of fluvial and glacial  
873 erosion through simulation of fluvial landscapes. *Geomorphology*, 75(3), 283-299.  
874 <https://doi.org/10.1016/j.geomorph.2005.07.028>
- 875 Broeckx, J., Rossi, M., Lijnen, K., Campforts, B., Poesen, J., & Vanmaercke, M. (2020). Landslide  
876 mobilization rates : A global analysis and model. *Earth-Science Reviews*, 201, 102972.  
877 <https://doi.org/10.1016/j.earscirev.2019.102972>
- 878 Brown, E. T., Stallard, R. F., Larsen, M. C., Raisbeck, G. M., & Yiou, F. (1995). Denudation rates  
879 determined from the accumulation of in situ-produced  $^{10}\text{Be}$  in the luquillo experimental  
880 forest, Puerto Rico. *Earth and Planetary Science Letters*, 129(1), 193-202.  
881 [https://doi.org/10.1016/0012-821X\(94\)00249-X](https://doi.org/10.1016/0012-821X(94)00249-X)
- 882 Brozović, N., Burbank, D. W., & Meigs, A. J. (1997). Climatic Limits on Landscape Development in the  
883 Northwestern Himalaya. *Science*, 276(5312), 571-574.  
884 <https://doi.org/10.1126/science.276.5312.571>
- 885 Buechi, M. W., Graf, H. R., Haldimann, P., Lowick, S. E., & Anselmetti, F. S. (2018). Multiple  
886 Quaternary erosion and infill cycles in overdeepened basins of the northern Alpine foreland.  
887 *Swiss Journal of Geosciences*, 111(1), Article 1. <https://doi.org/10.1007/s00015-017-0289-9>
- 888 Burbank, D. W., Leland, J., Fielding, E., Anderson, R. S., Brozovic, N., Reid, M. R., & Duncan, C. (1996).  
889 Bedrock incision, rock uplift and threshold hillslopes in the northwestern Himalayas. *Nature*,  
890 379(6565), 505-510. <https://doi.org/10.1038/379505a0>
- 891 Campforts, B., Shobe, C. M., Overeem, I., & Tucker, G. E. (2022). The Art of Landslides : How  
892 Stochastic Mass Wasting Shapes Topography and Influences Landscape Dynamics. *Journal of*  
893 *Geophysical Research: Earth Surface*, 127(8), e2022JF006745.  
894 <https://doi.org/10.1029/2022JF006745>





- 895 Campforts, B., Shobe, C. M., Steer, P., Vanmaercke, M., Lague, D., & Braun, J. (2020). HyLands 1.0 : A  
896 hybrid landscape evolution model to simulate the impact of landslides and landslide-derived  
897 sediment on landscape evolution. *Geoscientific Model Development*, 13(9), 3863-3886.  
898 <https://doi.org/10.5194/gmd-13-3863-2020>
- 899 Carretier, S., Martinod, P., Reich, M., & Godderis, Y. (2016). Modelling sediment clasts transport  
900 during landscape evolution. *Earth Surface Dynamics*, 4(1), 237-251.  
901 <https://doi.org/10.5194/esurf-4-237-2016>
- 902 Carriere, A., Le Bouteiller, C., Tucker, G. E., Klotz, S., & Naaim, M. (2020). Impact of vegetation on  
903 erosion : Insights from the calibration and test of a landscape evolution model in alpine  
904 badland catchments. *Earth Surface Processes and Landforms*, 45(5), 1085-1099.  
905 <https://doi.org/10.1002/esp.4741>
- 906 Cathala, M., Magnin, F., Ravanel, L., Dorren, L., Zuanon, N., Berger, F., Bourrier, F., & Deline, P.  
907 (2024). Mapping release and propagation areas of permafrost-related rock slope failures in  
908 the French Alps : A new methodological approach at regional scale. *Geomorphology*, 448,  
909 109032. <https://doi.org/10.1016/j.geomorph.2023.109032>
- 910 Cavalli, M., Heckmann, T., & Marchi, L. (2019). Sediment Connectivity in Proglacial Areas. In T.  
911 Heckmann & D. Morche (Éds.), *Geomorphology of Proglacial Systems : Landform and*  
912 *Sediment Dynamics in Recently Deglaciated Alpine Landscapes* (p. 271-287). Springer  
913 International Publishing. [https://doi.org/10.1007/978-3-319-94184-4\\_16](https://doi.org/10.1007/978-3-319-94184-4_16)
- 914 Champagnac, J.-D., Valla, P. G., & Herman, F. (2014). Late-Cenozoic relief evolution under evolving  
915 climate : A review. *Tectonophysics*, 614, 44-65. <https://doi.org/10.1016/j.tecto.2013.11.037>
- 916 Claessens, L., Schoorl, J. M., & Veldkamp, A. (2007). Modelling the location of shallow landslides and  
917 their effects on landscape dynamics in large watersheds : An application for Northern New  
918 Zealand. *Geomorphology*, 87(1), 16-27. <https://doi.org/10.1016/j.geomorph.2006.06.039>



- 1919 Comiti, F., Mao, L., Penna, D., Dell'Agnese, A., Engel, M., Rathburn, S., & Cavalli, M. (2019). Glacier  
1920 melt runoff controls bedload transport in Alpine catchments. *Earth and Planetary Science*  
1921 *Letters*, 520, 77-86. <https://doi.org/10.1016/j.epsl.2019.05.031>
- 1922 Cossart, É. (2013). Influence of local vs. Regional settings on glaciation patterns in the French Alps.  
1923 *Geografia Fisica e Dinamica Quaternaria*, 36(1), Article 1.  
1924 <https://doi.org/10.4461/GFDQ.2013.36.3>
- 1925 Cossart, E., Braucher, R., Fort, M., Bourlès, D. L., & Carcaillet, J. (2008). Slope instability in relation to  
1926 glacial debuitressing in alpine areas (Upper Durance catchment, southeastern France) :  
1927 Evidence from field data and <sup>10</sup>Be cosmic ray exposure ages. *Geomorphology*, 95(1), 3-26.  
1928 <https://doi.org/10.1016/j.geomorph.2006.12.022>
- 1929 Coutterand, S. (2010). *Étude géomorphologique des flux glaciaires dans les Alpes nord-occidentales au*  
1930 *Pléistocène récent. Du maximum de la dernière glaciation aux premières étapes de la*  
1931 *déglaciation* [Phdthesis, Université de Savoie]. <https://theses.hal.science/tel-00517790>
- 1932 Croissant, T., Lague, D., Steer, P., & Davy, P. (2017). Rapid post-seismic landslide evacuation boosted  
1933 by dynamic river width. *Nature Geoscience*, 10(9), Article 9.  
1934 <https://doi.org/10.1038/ngeo3005>
- 1935 Culmann, K. (avec University of Michigan). (1875). *Die graphische Statik*. Zürich, Meyer & Zeller (A.  
1936 Reimann). <http://archive.org/details/diegraphischest01culmgoog>
- 1937 Cusicanqui, D. (2024). *cusicand/lidarhd\_ign\_downloader : V3.0* (Version v3.0) [Logiciel]. Zenodo.  
1938 <https://doi.org/10.5281/zenodo.13832516>
- 1939 Dahlquist, M. P., West, A. J., & Li, G. (2018). Landslide-driven drainage divide migration. *Geology*,  
1940 46(5), Article 5. <https://doi.org/10.1130/G39916.1>
- 1941 Davy, P., Croissant, T., & Lague, D. (2017). A precipiton method to calculate river hydrodynamics,  
1942 with applications to flood prediction, landscape evolution models, and braiding instabilities.  
1943 *Journal of Geophysical Research: Earth Surface*, 122(8), 1491-1512.  
1944 <https://doi.org/10.1002/2016JF004156>



- 945 Delgado, F., Zerathe, S., Schwartz, S., Mathieux, B., & Benavente, C. (2022). Inventory of large  
946 landslides along the Central Western Andes (ca. 15°–20° S) : Landslide distribution patterns  
947 and insights on controlling factors. *Journal of South American Earth Sciences*, 116, 103824.  
948 <https://doi.org/10.1016/j.jsames.2022.103824>
- 949 Delunel, R., Schlunegger, F., Valla, P. G., Dixon, J., Glotzbach, C., Hippe, K., Kober, F., Molliex, S.,  
950 Norton, K. P., Salcher, B., Wittmann, H., Akçar, N., & Christl, M. (2020). Late-Pleistocene  
951 catchment-wide denudation patterns across the European Alps. *Earth-Science Reviews*, 211,  
952 103407. <https://doi.org/10.1016/j.earscirev.2020.103407>
- 953 Delunel, R., van der Beek, P. A., Bourlès, D. L., Carcaillet, J., & Schlunegger, F. (2014). Transient  
954 sediment supply in a high-altitude Alpine environment evidenced through a 10Be budget of  
955 the Etages catchment (French Western Alps). *Earth Surface Processes and Landforms*, 39(7),  
956 890-899. <https://doi.org/10.1002/esp.3494>
- 957 Delunel, R., van der Beek, P. A., Carcaillet, J., Bourlès, D. L., & Valla, P. G. (2010). Frost-cracking  
958 control on catchment denudation rates : Insights from in situ produced 10Be concentrations  
959 in stream sediments (Ecrins–Pelvoux massif, French Western Alps). *Earth and Planetary  
960 Science Letters*, 293(1), 72-83. <https://doi.org/10.1016/j.epsl.2010.02.020>
- 961 Densmore, A. L., Ellis, M. A., & Anderson, R. S. (1998). Landsliding and the evolution of normal-fault-  
962 bounded mountains. *Journal of Geophysical Research: Solid Earth*, 103(B7), 15203-15219.  
963 <https://doi.org/10.1029/98JB00510>
- 964 Dietrich, W. E., Reiss, R., Hsu, M.-L., & Montgomery, D. R. (1995). A process-based model for colluvial  
965 soil depth and shallow landsliding using digital elevation data. *Hydrological Processes*, 9(3-4),  
966 383-400. <https://doi.org/10.1002/hyp.3360090311>
- 967 Egholm, D. L., Jansen, J. D., Brædstrup, C. F., Pedersen, V. K., Andersen, J. L., Ugelvig, S. V., Larsen, N.  
968 K., & Knudsen, M. F. (2017). Formation of plateau landscapes on glaciated continental  
969 margins. *Nature Geoscience*, 10(8), 592-597. <https://doi.org/10.1038/ngeo2980>



- 970 Egholm, D. L., Nielsen, S. B., Pedersen, V. K., & Lesemann, J.-E. (2009). Glacial effects limiting  
971 mountain height. *Nature*, 460(7257), 884-887. <https://doi.org/10.1038/nature08263>
- 972 Fox, M., Herman, F., Kissling, E., & Willett, S. D. (2015). Rapid exhumation in the Western Alps driven  
973 by slab detachment and glacial erosion. *Geology*, 43(5), 379-382.  
974 <https://doi.org/10.1130/G36411.1>
- 975 French, H. M. (2017). *The Periglacial Environment*. John Wiley & Sons.
- 976 Gallach, X., Carcaillet, J., Ravanel, L., Deline, P., Ogier, C., Rossi, M., Malet, E., & Garcia-Sellés, D.  
977 (2020). Climatic and structural controls on Late-glacial and Holocene rockfall occurrence in  
978 high-elevated rock walls of the Mont Blanc massif (Western Alps). *Earth Surface Processes*  
979 *and Landforms*, 45(13), 3071-3091. <https://doi.org/10.1002/esp.4952>
- 980 Ganti, V., von Hagke, C., Scherler, D., Lamb, M. P., Fischer, W. W., & Avouac, J.-P. (2016). Time scale  
981 bias in erosion rates of glaciated landscapes. *Science Advances*, 2(10), Article 10.  
982 <https://doi.org/10.1126/sciadv.1600204>
- 983 George, D. L., & Iverson, R. M. (2014). A depth-averaged debris-flow model that includes the effects  
984 of evolving dilatancy. II. Numerical predictions and experimental tests. *Proceedings of the*  
985 *Royal Society A: Mathematical, Physical and Engineering Sciences*, 470(2170), 20130820.  
986 <https://doi.org/10.1098/rspa.2013.0820>
- 987 Guzzetti, F., Malamud, B. D., Turcotte, D. L., & Reichenbach, P. (2002). Power-law correlations of  
988 landslide areas in central Italy. *Earth and Planetary Science Letters*, 195(3), 169-183.  
989 [https://doi.org/10.1016/S0012-821X\(01\)00589-1](https://doi.org/10.1016/S0012-821X(01)00589-1)
- 990 Hallet, B., Hunter, L., & Bogen, J. (1996). Rates of erosion and sediment evacuation by glaciers : A  
991 review of field data and their implications. *Global and Planetary Change*, 12(1), Article 1.  
992 [https://doi.org/10.1016/0921-8181\(95\)00021-6](https://doi.org/10.1016/0921-8181(95)00021-6)
- 993 Heimsath, A. M., Furbish, D. J., & Dietrich, W. E. (2005). The illusion of diffusion : Field evidence for  
994 depth-dependent sediment transport. *Geology*, 33(12), 949-952.  
995 <https://doi.org/10.1130/G21868.1>



- 996 Hergarten, S., & Robl, J. (2015). Modelling rapid mass movements using the shallow water equations  
997 in Cartesian coordinates. *Natural Hazards and Earth System Sciences*, 15(3), 671-685.  
998 <https://doi.org/10.5194/nhess-15-671-2015>
- 999 Herman, F., Beaud, F., Champagnac, J.-D., Lemieux, J.-M., & Sternai, P. (2011). Glacial hydrology and  
1000 erosion patterns : A mechanism for carving glacial valleys. *Earth and Planetary Science*  
1001 *Letters*, 310(3), 498-508. <https://doi.org/10.1016/j.epsl.2011.08.022>
- 1002 Herman, F., & Braun, J. (2008). Evolution of the glacial landscape of the Southern Alps of New  
1003 Zealand : Insights from a glacial erosion model. *Journal of Geophysical Research: Earth*  
1004 *Surface*, 113(F2). <https://doi.org/10.1029/2007JF000807>
- 1005 Herman, F., & Champagnac, J.-D. (2016). Plio-Pleistocene increase of erosion rates in mountain belts  
1006 in response to climate change. *Terra Nova*, 28(1), 2-10. <https://doi.org/10.1111/ter.12186>
- 1007 Herman, F., De Doncker, F., Delaney, I., Prasicek, G., & Koppes, M. (2021). The impact of glaciers on  
1008 mountain erosion. *Nature Reviews Earth & Environment*, 2(6), 422-435.  
1009 <https://doi.org/10.1038/s43017-021-00165-9>
- 1010 Herman, F., Seward, D., Valla, P. G., Carter, A., Kohn, B., Willett, S. D., & Ehlers, T. A. (2013).  
1011 Worldwide acceleration of mountain erosion under a cooling climate. *Nature*, 504(7480),  
1012 423-426. <https://doi.org/10.1038/nature12877>
- 1013 Hobley, D. E. J., Adams, J. M., Nudurupati, S. S., Hutton, E. W. H., Gasparini, N. M., Istanbuluoglu, E.,  
1014 & Tucker, G. E. (2017). Creative computing with Landlab : An open-source toolkit for building,  
1015 coupling, and exploring two-dimensional numerical models of Earth-surface dynamics. *Earth*  
1016 *Surface Dynamics*, 5(1), 21-46. <https://doi.org/10.5194/esurf-5-21-2017>
- 1017 Hooke, J. (2003). Coarse sediment connectivity in river channel systems : A conceptual framework  
1018 and methodology. *Geomorphology*, 56(1), Article 1. [https://doi.org/10.1016/S0169-](https://doi.org/10.1016/S0169-555X(03)00047-3)  
1019 [555X\(03\)00047-3](https://doi.org/10.1016/S0169-555X(03)00047-3)



- 1020 Hovius, N., Stark, C. P., & Allen, P. A. (1997). Sediment flux from a mountain belt derived by landslide  
1021 mapping. *Geology*, 25(3), 231-234. [https://doi.org/10.1130/0091-](https://doi.org/10.1130/0091-7613(1997)025<0231:SFFAMB>2.3.CO;2)  
1022 7613(1997)025<0231:SFFAMB>2.3.CO;2
- 1023 Hovius, N., Stark, C. P., Hao-Tsu, C., & Jiun-Chuan, L. (2000). Supply and Removal of Sediment in a  
1024 Landslide-Dominated Mountain Belt : Central Range, Taiwan. *The Journal of Geology*, 108(1),  
1025 73-89. <https://doi.org/10.1086/314387>
- 1026 Ivy-Ochs, S., Martin, S., Campedel, P., Hippe, K., Alifimov, V., Vockenhuber, C., Andreotti, E., Carugati,  
1027 G., Pasqual, D., Rigo, M., & Viganò, A. (2017). Geomorphology and age of the Marocche di  
1028 Dro rock avalanches (Trentino, Italy). *Quaternary Science Reviews*, 169, 188-205.  
1029 <https://doi.org/10.1016/j.quascirev.2017.05.014>
- 1030 Jeandet, L., Steer, P., Lague, D., & Davy, P. (2019). *Coulomb Mechanics and Relief Constraints Explain*  
1031 *Landslide Size Distribution—Jeandet—2019—Geophysical Research Letters—Wiley Online*  
1032 *Library*. <https://agupubs.onlinelibrary.wiley.com/doi/full/10.1029/2019GL082351>
- 1033 Keefer, D. K. (1984). Landslides caused by earthquakes. *GSA Bulletin*, 95(4), 406-421.  
1034 [https://doi.org/10.1130/0016-7606\(1984\)95<406:LCBE>2.0.CO;2](https://doi.org/10.1130/0016-7606(1984)95<406:LCBE>2.0.CO;2)
- 1035 Koppes, M., Hallet, B., Rignot, E., Mouginot, J., Wellner, J. S., & Boldt, K. (2015). Observed latitudinal  
1036 variations in erosion as a function of glacier dynamics. *Nature*, 526(7571), 100-103.  
1037 <https://doi.org/10.1038/nature15385>
- 1038 Koppes, M. N., & Montgomery, D. R. (2009). The relative efficacy of fluvial and glacial erosion over  
1039 modern to orogenic timescales. *Nature Geoscience*, 2(9), 644-647.  
1040 <https://doi.org/10.1038/ngeo616>
- 1041 Korup, O. (2006). Effects of large deep-seated landslides on hillslope morphology, western Southern  
1042 Alps, New Zealand. *Journal of Geophysical Research: Earth Surface*, 111(F1), Article F1.  
1043 <https://doi.org/10.1029/2004JF000242>



- 1044 Korup, O., Clague, J. J., Hermanns, R. L., Hewitt, K., Strom, A. L., & Weidinger, J. T. (2007). Giant  
1045 landslides, topography, and erosion. *Earth and Planetary Science Letters*, 261(3), 578-589.  
1046 <https://doi.org/10.1016/j.epsl.2007.07.025>
- 1047 Kuhlemann, J., Frisch, W., Székely, B., Dunkl, I., & Kázmér, M. (2002). Post-collisional sediment  
1048 budget history of the Alps : Tectonic versus climatic control. *International Journal of Earth*  
1049 *Sciences*, 91(5), 818-837. <https://doi.org/10.1007/s00531-002-0266-y>
- 1050 Lane, S. N., Bakker, M., Gabbud, C., Micheletti, N., & Saugy, J.-N. (2017). Sediment export, transient  
1051 landscape response and catchment-scale connectivity following rapid climate warming and  
1052 Alpine glacier recession. *Geomorphology*, 277, 210-227.  
1053 <https://doi.org/10.1016/j.geomorph.2016.02.015>
- 1054 Langston, A. L., & Tucker, G. E. (2018). Developing and exploring a theory for the lateral erosion of  
1055 bedrock channels for use in landscape evolution models. *Earth Surface Dynamics*, 6(1),  
1056 Article 1. <https://doi.org/10.5194/esurf-6-1-2018>
- 1057 Larsen, I. J., & Montgomery, D. R. (2012). Landslide erosion coupled to tectonics and river incision.  
1058 *Nature Geoscience*, 5(7), 468-473. <https://doi.org/10.1038/ngeo1479>
- 1059 Lavé, J., Guérin, C., Valla, P. G., Guillou, V., Rigaudier, T., Benedetti, L., France-Lanord, C., Gajurel, A.  
1060 P., Morin, G., Dumoulin, J. P., Moreau, C., & Galy, V. (2023). Medieval demise of a Himalayan  
1061 giant summit induced by mega-landslide. *Nature*, 619(7968), 94-101.  
1062 <https://doi.org/10.1038/s41586-023-06040-5>
- 1063 Le Roy, M., Deline, P., Carcaillet, J., Schimmelpfennig, I., & Ermini, M. (2017). 10Be exposure dating of  
1064 the timing of Neoglacial glacier advances in the Ecrins-Pelvoux massif, southern French Alps.  
1065 *Quaternary Science Reviews*, 178, 118-138. <https://doi.org/10.1016/j.quascirev.2017.10.010>
- 1066 Lebrouc, V., Schwartz, S., Baillet, L., Jongmans, D., & Gamond, J. F. (2013). Modeling permafrost  
1067 extension in a rock slope since the Last Glacial Maximum : Application to the large  
1068 Séchilienne landslide (French Alps). *Geomorphology*, 198, 189-200.  
1069 <https://doi.org/10.1016/j.geomorph.2013.06.001>



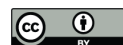

- 1070    Lehmann, B., & Robert, X. (2024). *Simple\_swath*, a simple Python code to extract swath profile using  
1071                    *a shapefile* (Version 2.0.0) [Logiciel]. Zenodo. <https://doi.org/10.5281/zenodo.13771754>
- 1072    Leith, K., Fox, M., & Moore, J. R. (2018). Signatures of Late Pleistocene fluvial incision in an Alpine  
1073                    landscape. *Earth and Planetary Science Letters*, 483, 13-28.  
1074                    <https://doi.org/10.1016/j.epsl.2017.11.050>
- 1075    Leith, K., Moore, J. R., Amann, F., & Loew, S. (2014). Subglacial extensional fracture development and  
1076                    implications for Alpine Valley evolution. *Journal of Geophysical Research: Earth Surface*,  
1077                    119(1), 62-81. <https://doi.org/10.1002/2012JF002691>
- 1078    Liebl, M., Robl, J., Egholm, D. L., Prasicek, G., Stüwe, K., Gradwohl, G., & Hergarten, S. (2021).  
1079                    Topographic signatures of progressive glacial landscape transformation. *Earth Surface*  
1080                    *Processes and Landforms*, 46(10), 1964-1980. <https://doi.org/10.1002/esp.5139>
- 1081    Louis, H. (1952). Zur Theorie der Gletschererosion in Tälern. *E&G Quaternary Science Journal*, 2(1),  
1082                    12-24. <https://doi.org/10.3285/eg.02.1.02>
- 1083    Magnin, F., Josnin, J.-Y., Ravanel, L., Pergaud, J., Pohl, B., & Deline, P. (2017). Modelling rock wall  
1084                    permafrost degradation in the Mont Blanc massif from the LIA to the end of the 21st century.  
1085                    *The Cryosphere*, 11(4), 1813-1834. <https://doi.org/10.5194/tc-11-1813-2017>
- 1086    Malamud, B. D., Turcotte, D. L., Guzzetti, F., & Reichenbach, P. (2004). Landslide inventories and their  
1087                    statistical properties. *Earth Surface Processes and Landforms*, 29(6), 687-711.  
1088                    <https://doi.org/10.1002/esp.1064>
- 1089    Martin, H. A., Peruzzetto, M., Viroulet, S., Mangeney, A., Lagrée, P.-Y., Popinet, S., Maury, B.,  
1090                    Lefebvre-Lepot, A., Maday, Y., & Bouchut, F. (2023). Numerical simulations of granular dam  
1091                    break : Comparison between discrete element, Navier-Stokes, and thin-layer models.  
1092                    *Physical Review E*, 108(5), 054902. <https://doi.org/10.1103/PhysRevE.108.054902>
- 1093    Marx, H. E., Dentant, C., Renaud, J., Delunel, R., Tank, D. C., & Lavergne, S. (2017). Riders in the sky  
1094                    (islands) : Using a mega-phylogenetic approach to understand plant species distribution and



- 1095 coexistence at the altitudinal limits of angiosperm plant life. *Journal of Biogeography*, 44(11),  
1096 2618-2630. <https://doi.org/10.1111/jbi.13073>
- 1097 McColl, S. T. (2012). Paraglacial rock-slope stability. *Geomorphology*, 153-154, 1-16.  
1098 <https://doi.org/10.1016/j.geomorph.2012.02.015>
- 1099 Métivier, F., Gaudemer, Y., Tapponnier, P., & Klein, M. (1999). Mass accumulation rates in Asia during  
1100 the Cenozoic. *Geophysical Journal International*, 137(2), 280-318.  
1101 <https://doi.org/10.1046/j.1365-246X.1999.00802.x>
- 1102 Meunier, P., Hovius, N., & Haines, J. A. (2008). Topographic site effects and the location of  
1103 earthquake induced landslides. *Earth and Planetary Science Letters*, 275(3), 221-232.  
1104 <https://doi.org/10.1016/j.epsl.2008.07.020>
- 1105 Micheletti, N., Lambiel, C., & Lane, S. N. (2015). Investigating decadal-scale geomorphic dynamics in  
1106 an alpine mountain setting. *Journal of Geophysical Research: Earth Surface*, 120(10), Article  
1107 10. <https://doi.org/10.1002/2015JF003656>
- 1108 Mitchell, S. G., & Montgomery, D. R. (2006). Influence of a glacial buzzsaw on the height and  
1109 morphology of the Cascade Range in central Washington State, USA. *Quaternary Research*,  
1110 65(1), 96-107. <https://doi.org/10.1016/j.yqres.2005.08.018>
- 1111 Montgomery, D. R., & Korup, O. (2011). Preservation of inner gorges through repeated Alpine  
1112 glaciations. *Nature Geoscience*, 4(1), 62-67. <https://doi.org/10.1038/ngeo1030>
- 1113 Morriss, M. C., Lehmann, B., Campforts, B., Brencher, G., Rick, B., Anderson, L. S., Handwerger, A. L.,  
1114 Overeem, I., & Moore, J. (2023). Alpine hillslope failure in the western US : Insights from the  
1115 Chaos Canyon landslide, Rocky Mountain National Park, USA. *Earth Surface Dynamics*, 11(6),  
1116 1251-1274. <https://doi.org/10.5194/esurf-11-1251-2023>
- 1117 Mudd, S. M., Harel, M.-A., Hurst, M. D., Grieve, S. W. D., & Marrero, S. M. (2016). The CAIRN  
1118 method : Automated, reproducible calculation of catchment-averaged denudation rates from  
1119 cosmogenic nuclide concentrations. *Earth Surface Dynamics*, 4(3), 655-674.  
1120 <https://doi.org/10.5194/esurf-4-655-2016>



- 1121 Müller, T., Lane, S. N., & Schaepli, B. (2022). Towards a hydrogeomorphological understanding of  
1122 proglacial catchments : An assessment of groundwater storage and release in an Alpine  
1123 catchment. *Hydrology and Earth System Sciences*, 26(23), 6029-6054.  
1124 <https://doi.org/10.5194/hess-26-6029-2022>
- 1125 Muñoz, E., Ochoa, A., & Cordão-Neto, M. (2016). Probabilistic assessment of precipitation-triggered  
1126 landslides : The role of vegetation. *E3S Web of Conferences*, 9, 08001.  
1127 <https://doi.org/10.1051/e3sconf/20160908001>
- 1128 Nocquet, J.-M., Sue, C., Walpersdorf, A., Tran, T., Lenôtre, N., Vernant, P., Cushing, M., Jouanne, F.,  
1129 Masson, F., Baize, S., Chéry, J., & van der Beek, P. A. (2016). Present-day uplift of the western  
1130 Alps. *Scientific Reports*, 6(1), Article 1. <https://doi.org/10.1038/srep28404>
- 1131 Norton, K. P., Abbühl, L. M., & Schlunegger, F. (2010). Glacial conditioning as an erosional driving  
1132 force in the Central Alps. *Geology*, 38(7), 655-658. <https://doi.org/10.1130/G31102.1>
- 1133 Pedersen, V. K., & Egholm, D. L. (2013). Glaciations in response to climate variations preconditioned  
1134 by evolving topography. *Nature*, 493(7431), 206-210. <https://doi.org/10.1038/nature11786>
- 1135 Pedersen, V. K., Egholm, D. L., & Nielsen, S. B. (2010). Alpine glacial topography and the rate of rock  
1136 column uplift : A global perspective. *Geomorphology*, 122(1), 129-139.  
1137 <https://doi.org/10.1016/j.geomorph.2010.06.005>
- 1138 Peizhen, Z., Molnar, P., & Downs, W. R. (2001). Increased sedimentation rates and grain sizes 2–4  
1139 Myr ago due to the influence of climate change on erosion rates. *Nature*, 410(6831),  
1140 891-897. <https://doi.org/10.1038/35073504>
- 1141 Penck, A. (1905). Glacial Features in the Surface of the Alps. *The Journal of Geology*, 13(1), 1-19.  
1142 <https://doi.org/10.1086/621202>
- 1143 Perron, J. T. (2011). Numerical methods for nonlinear hillslope transport laws. *Journal of Geophysical*  
1144 *Research: Earth Surface*, 116(F2). <https://doi.org/10.1029/2010JF001801>



- 1145 Pitlick, J., Recking, A., Liebault, F., Misset, C., Piton, G., & Vazquez-Tarrio, D. (2021). Sediment  
1146 Production in French Alpine Rivers. *Water Resources Research*, 57(12), e2021WR030470.  
1147 <https://doi.org/10.1029/2021WR030470>
- 1148 Portenga, E. W., & Bierman, P. R. (2011). Understanding earth's eroding surface with  $^{10}\text{Be}$ . *College of*  
1149 *Arts and Sciences Faculty Publications*. <https://doi.org/10.1130/G111A.1>
- 1150 Prasicek, G., Hergarten, S., Deal, E., Herman, F., & Robl, J. (2020). A glacial buzzsaw effect generated  
1151 by efficient erosion of temperate glaciers in a steady state model. *Earth and Planetary*  
1152 *Science Letters*, 543, 116350. <https://doi.org/10.1016/j.epsl.2020.116350>
- 1153 Prasicek, G., Larsen, I. J., & Montgomery, D. R. (2015). Tectonic control on the persistence of glacially  
1154 sculpted topography. *Nature Communications*, 6(1), 8028.  
1155 <https://doi.org/10.1038/ncomms9028>
- 1156 Ravanel, L., Magnin, F., & Deline, P. (2017). Impacts of the 2003 and 2015 summer heatwaves on  
1157 permafrost-affected rock-walls in the Mont Blanc massif. *Science of The Total Environment*,  
1158 609, 132-143. <https://doi.org/10.1016/j.scitotenv.2017.07.055>
- 1159 Roering, J. (2012). Landslides limit mountain relief. *Nature Geoscience*, 5(7), 446-447.  
1160 <https://doi.org/10.1038/ngeo1511>
- 1161 Roering, J. J., Kirchner, J. W., & Dietrich, W. E. (1999). Evidence for nonlinear, diffusive sediment  
1162 transport on hillslopes and implications for landscape morphology. *Water Resources*  
1163 *Research*, 35(3), 853-870. <https://doi.org/10.1029/1998WR900090>
- 1164 Rootes, C. M., & Clark, C. D. (2020). Glacial trimlines to identify former ice margins and subglacial  
1165 thermal boundaries : A review and classification scheme for trimline expression. *Earth-*  
1166 *Science Reviews*, 210, 103355. <https://doi.org/10.1016/j.earscirev.2020.103355>
- 1167 Roussel, E., Marren, P. M., Cossart, E., Toumazet, J.-P., Chenet, M., Grancher, D., & Jomelli, V. (2018).  
1168 Incision and aggradation in proglacial rivers : Post-Little Ice Age long-profile adjustments of  
1169 Southern Iceland outwash plains. *Land Degradation & Development*, 29(10), 3753-3771.  
1170 <https://doi.org/10.1002/ldr.3127>



- 1171 Scherler, D. (2014). Climatic limits to headwall retreat in the Khumbu Himalaya, eastern Nepal.  
1172 *Geology*, 42(11), 1019-1022. <https://doi.org/10.1130/G35975.1>
- 1173 Schlunegger, F., & Hinderer, M. (2003). Pleistocene/Holocene climate change, re-establishment of  
1174 fluvial drainage network and increase in relief in the Swiss Alps. *Terra Nova*, 15(2), 88-95.  
1175 <https://doi.org/10.1046/j.1365-3121.2003.00469.x>
- 1176 Schwartz, S., Zerathe, S., Jongmans, D., Baillet, L., Carcaillet, J., Audin, L., Dumont, T., Bourlès, D.,  
1177 Braucher, R., & Lebruc, V. (2017). Cosmic ray exposure dating on the large landslide of  
1178 Séchilienne (Western Alps) : A synthesis to constrain slope evolution. *Geomorphology*, 278,  
1179 329-344. <https://doi.org/10.1016/j.geomorph.2016.11.014>
- 1180 Seguinot, J., & Delaney, I. (2021). Last-glacial-cycle glacier erosion potential in the Alps. *Earth Surface*  
1181 *Dynamics*, 9(4), 923-935. <https://doi.org/10.5194/esurf-9-923-2021>
- 1182 Shuster, D. L., Ehlers, T. A., Rusmoren, M. E., & Farley, K. A. (2005). Rapid Glacial Erosion at 1.8 Ma  
1183 Revealed by  $4\text{He}/3\text{He}$  Thermochronometry. *Science*, 310(5754), 1668-1670.  
1184 <https://doi.org/10.1126/science.1118519>
- 1185 Solomina, O. N., Bradley, R. S., Hodgson, D. A., Ivy-Ochs, S., Jomelli, V., Mackintosh, A. N., Nesje, A.,  
1186 Owen, L. A., Wanner, H., Wiles, G. C., & Young, N. E. (2015). Holocene glacier fluctuations.  
1187 *Quaternary Science Reviews*, 111, 9-34. <https://doi.org/10.1016/j.quascirev.2014.11.018>
- 1188 Stark, C. P., & Hovius, N. (2001). The characterization of landslide size distributions. *Geophysical*  
1189 *Research Letters*, 28(6), 1091-1094. <https://doi.org/10.1029/2000GL008527>
- 1190 Steer, P., Huismans, R. S., Valla, P. G., Gac, S., & Herman, F. (2012). Bimodal Plio–Quaternary glacial  
1191 erosion of fjords and low-relief surfaces in Scandinavia. *Nature Geoscience*, 5(9), Article 9.  
1192 <https://doi.org/10.1038/ngeo1549>
- 1193 Sternai, P., Herman, F., Valla, P. G., & Champagnac, J.-D. (2013). Spatial and temporal variations of  
1194 glacial erosion in the Rhône valley (Swiss Alps) : Insights from numerical modeling. *Earth and*  
1195 *Planetary Science Letters*, 368, 119-131. <https://doi.org/10.1016/j.epsl.2013.02.039>



- 1196 Sternai, P., Sue, C., Husson, L., Serpelloni, E., Becker, T. W., Willett, S. D., Faccenna, C., Di Giulio, A.,  
1197 Spada, G., Jolivet, L., Valla, P., Petit, C., Nocquet, J.-M., Walpersdorf, A., & Castelltort, S.  
1198 (2019). Present-day uplift of the European Alps : Evaluating mechanisms and models of their  
1199 relative contributions. *Earth-Science Reviews*, 190, 589-604.  
1200 <https://doi.org/10.1016/j.earscirev.2019.01.005>
- 1201 Stoffel, M., Trappmann, D. G., Coullie, M. I., Ballesteros Cánovas, J. A., & Corona, C. (2024). Rockfall  
1202 from an increasingly unstable mountain slope driven by climate warming. *Nature Geoscience*,  
1203 1-6. <https://doi.org/10.1038/s41561-024-01390-9>
- 1204 Tanyaş, H., Allstadt, K. E., & van Westen, C. J. (2018). An updated method for estimating landslide-  
1205 event magnitude. *Earth Surface Processes and Landforms*, 43(9), 1836-1847.  
1206 <https://doi.org/10.1002/esp.4359>
- 1207 Tanyaş, H., van Westen, C. J., Allstadt, K. E., & Jibson, R. W. (2019). Factors controlling landslide  
1208 frequency–area distributions. *Earth Surface Processes and Landforms*, 44(4), 900-917.  
1209 <https://doi.org/10.1002/esp.4543>
- 1210 Tebbens, S. F. (2020). *Landslide Scaling : A Review—Tebbens—2020—Earth and Space Science—*  
1211 *Wiley Online Library*.  
1212 <https://agupubs.onlinelibrary.wiley.com/doi/full/10.1029/2019EA000662>
- 1213 Thomson, S. N., Brandon, M. T., Tomkin, J. H., Reiners, P. W., Vásquez, C., & Wilson, N. J. (2010).  
1214 Glaciation as a destructive and constructive control on mountain building. *Nature*, 467(7313),  
1215 313-317. <https://doi.org/10.1038/nature09365>
- 1216 Tomkin, J. H., & Braun, J. (2002). The influence of alpine glaciation on the relief of tectonically active  
1217 mountain belts. *American Journal of Science*, 302(3), 169-190.  
1218 <https://doi.org/10.2475/ajs.302.3.169>
- 1219 Tucker, G. E., & Hancock, G. R. (2010). Modelling landscape evolution. *Earth Surface Processes and*  
1220 *Landforms*, 35(1), 28-50. <https://doi.org/10.1002/esp.1952>



- 1221 Valla, P. G. (2021). A tribute to Louis (1952) : On the theory of glacial erosion in valleys. *E&G*
- 1222 *Quaternary Science Journal*, 70(2), 209-212. <https://doi.org/10.5194/egqsj-70-209-2021>
- 1223 Valla, P. G., Shuster, D. L., & van der Beek, P. A. (2011). Significant increase in relief of the European
- 1224 Alps during mid-Pleistocene glaciations. *Nature Geoscience*, 4(10), 688-692.
- 1225 <https://doi.org/10.1038/ngeo1242>
- 1226 Valla, P. G., van der Beek, P. A., & Lague, D. (2010). Fluvial incision into bedrock : Insights from
- 1227 morphometric analysis and numerical modeling of gorges incising glacial hanging valleys
- 1228 (Western Alps, France). *Journal of Geophysical Research: Earth Surface*, 115(F2).
- 1229 <https://doi.org/10.1029/2008JF001079>
- 1230 Van Den Eeckhaut, M., Poesen, J., Govers, G., Verstraeten, G., & Demoulin, A. (2007). Characteristics
- 1231 of the size distribution of recent and historical landslides in a populated hilly region. *Earth*
- 1232 *and Planetary Science Letters*, 256(3), 588-603. <https://doi.org/10.1016/j.epsl.2007.01.040>
- 1233 van der Beek, P., & Bourbon, P. (2008). A quantification of the glacial imprint on relief development
- 1234 in the French western Alps. *Geomorphology*, 97(1), Article 1.
- 1235 <https://doi.org/10.1016/j.geomorph.2007.02.038>
- 1236 von Blanckenburg, F. (2005). The control mechanisms of erosion and weathering at basin scale from
- 1237 cosmogenic nuclides in river sediment. *Earth and Planetary Science Letters*, 237(3), 462-479.
- 1238 <https://doi.org/10.1016/j.epsl.2005.06.030>
- 1239 Whipple, K. X. (2001). Fluvial Landscape Response Time : How Plausible Is Steady-State Denudation?
- 1240 *American Journal of Science*, 301(4-5), 313-325. <https://doi.org/10.2475/ajs.301.4-5.313>
- 1241 Wood, J. L., Harrison, S., & Reinhardt, L. (2015). Landslide inventories for climate impacts research in
- 1242 the European Alps. *Geomorphology*, 228, 398-408.
- 1243 <https://doi.org/10.1016/j.geomorph.2014.09.005>
- 1244 Zachos, J., Pagani, M., Sloan, L., Thomas, E., & Billups, K. (2001). Trends, Rhythms, and Aberrations in
- 1245 Global Climate 65 Ma to Present. *Science*, 292(5517), 686-693.
- 1246 <https://doi.org/10.1126/science.1059412>



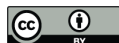

- 1247 Zech, R., Zech, M., Kubik, P. W., Kharki, K., & Zech, W. (2009). Deglaciation and landscape history  
1248 around Annapurna, Nepal, based on  $^{10}\text{Be}$  surface exposure dating. *Quaternary Science*  
1249 *Reviews*, 28(11), 1106-1118. <https://doi.org/10.1016/j.quascirev.2008.11.013>
- 1250 Zerathe, S., Lebourg, T., Braucher, R., & Bourlès, D. (2014). Mid-Holocene cluster of large-scale  
1251 landslides revealed in the Southwestern Alps by  $^{36}\text{Cl}$  dating. Insight on an Alpine-scale  
1252 landslide activity. *Quaternary Science Reviews*, 90, 106-127.  
1253 <https://doi.org/10.1016/j.quascirev.2014.02.015>
- 1254 Zhang, T., Li, D., East, A. E., Walling, D. E., Lane, S., Overeem, I., Beylich, A. A., Koppes, M., & Lu, X.  
1255 (2022). Warming-driven erosion and sediment transport in cold regions. *Nature Reviews*  
1256 *Earth & Environment*, 3(12), 832-851. <https://doi.org/10.1038/s43017-022-00362-0>
- 1257
- 1258
